# Supplementary material for: The effects of the heavy metals cadmium and lead on six metabolic and immune-related enzymes in the loach (Misgurnus anguillicaudatus)
Source: PeerJ. 2026 Jan 7;14:e20547. doi: 10.7717/peerj.20547 (PMC12790279; doi:10.7717/peerj.20547)
Supplement: Supplemental Information 1 — ACP, acid phosphatase; ALP, alkaline phosphatase; ATPase, adenosine triphosphatase; ND, Not detectable; NSE, non-specific esterase; POX, peroxidase; SD, standard deviation; SDH, succinate dehydrogenase. Two-tailed independent Student’s T tests were employed for comparisons. Characters sharing the same letter in the same column indicate no significant difference. [file peerj-14-20547-s001.xlsx]

## Sheet: Distribution-ACP
				Distribution of ACP enzymes in Misgurnus anguillicaudatus (Mean ± SD, N = 18)（Table 1 Analysis）
	Heart	Control MOD		Hepatopancreas	Control MOD		Gill	Control MOD		Kidney	Control MOD		Stomach	Control MOD		intestine	Control MOD
	1	0.121178		2	0.374709		3	0.480162		4	0.254734		5	0.615376		6	0.505232
	1	0.176778		2	0.358377		3	0.366963		4	0.240863		5	0.603936		6	0.575257
	1	0.104383		2	0.426672		3	0.391314		4	0.215815		5	0.610401		6	0.563854
	1	0.125933		2	0.330725		3	0.391145		4	0.350279		5	0.507902		6	0.562489
	1	0.128481		2	0.307472		3	0.394685		4	0.336755		5	0.567753		6	0.529337
	1	0.157465		2	0.300149		3	0.503703		4	0.321245		5	0.507428		6	0.564028
	1	0.201855		2	0.362213		3	0.365097		4	0.30271		5	0.511678		6	0.456862
	1	0.119616		2	0.392122		3	0.392093		4	0.287473		5	0.504326		6	0.455056
	1	0.136256		2	0.384627		3	0.425317		4	0.284104		5	0.523696		6	0.493959
	1	0.175921		2	0.341213		3	0.402905		4	0.356935		5	0.569138		6	0.514574
	1	0.187248		2	0.395544		3	0.457961		4	0.307547		5	0.517954		6	0.561778
	1	0.155679		2	0.403077		3	0.376672		4	0.322431		5	0.581054		6	0.522954
	1	0.189831		2	0.442579		3	0.403304		4	0.312272		5	0.54052		6	0.533375
	1	0.202518		2	0.374652		3	0.505131		4	0.337993		5	0.519507		6	0.51264
	1	0.167161		2	0.434307		3	0.41547		4	0.354351		5	0.582797		6	0.575092
	1	0.184267		2	0.434307		3	0.458415		4	0.293449		5	0.542142		6	0.534975
	1	0.17641		2	0.3991		3	0.398872		4	0.339007		5	0.540454		6	0.533309
	1	0.162568		2	0.406701		3	0.453377		4	0.325414		5	0.519444		6	0.512577
	Mean	0.159642		Mean	0.381586		Mean	0.421255		Mean	0.307965		Mean	0.548084		Mean	0.528186
	SD	0.0303071		SD	0.0422718		SD	0.0445377		SD	0.0397038		SD	0.0379248		SD	0.0361451
	Different letters of ACP enzymes in the same column indicate significant differences among different organs（Table 1 Analysis）
	1	2	3	4	5	6		Mean±SD
1								0.55±0.04	Stomach	5	a
2	**							0.53±0.04	intestine	6	a
3	**	**						0.42±0.04	Gill	3	b
4	**	**	**					0.38±0.04	Hepatopancreas	2	c
5	**	**	**	**				0.31±0.04	Kidney	4	d
6	**	**	**	**	/			0.16±0.03	Heart	1	e
	The exact p-value of ACP enzymes (Two-tailed independent Student’s T tests were employed for comparisons)
p value	1	2	3	4	5	6
1
2	4.9622e-19
3	8.73354e-21	0.00969569
4	2.3115e-14	5.41722e-06	2.16603e-09
5	8.17037e-28	3.31097e-14	9.47242e-11	2.31775e-19
6	1.79354e-27	6.17665e-13	3.27152e-09	1.67672e-18	0.11635

## Sheet: Distribution-ALP
						Distribution of ALP enzymes in Misgurnus anguillicaudatus (Mean ± SD, N = 18)（Table 1 Analysis）
	Heart	Control MOD		Hepatopancreas	Control MOD		Gill	Control MOD		Kidney	Control MOD		Stomach	Control MOD		intestine	Control MOD
		ND		1	0.163737		2	0.120828			ND		3	0.412243		4	0.158438
		ND		1	0.174935		2	0.126619			ND		3	0.455729		4	0.159386
		ND		1	0.153022		2	0.129713			ND		3	0.406525		4	0.183327
		ND		1	0.143959		2	0.16193			ND		3	0.407858		4	0.176318
		ND		1	0.146294		2	0.151661			ND		3	0.447287		4	0.177238
		ND		1	0.137983		2	0.144849			ND		3	0.423493		4	0.175188
		ND		1	0.184475		2	0.137163			ND		3	0.342781		4	0.156157
		ND		1	0.184074		2	0.141357			ND		3	0.344833		4	0.153178
		ND		1	0.187923		2	0.138826			ND		3	0.347751		4	0.153167
		ND		1	0.13607		2	0.122552			ND		3	0.489031		4	0.175721
		ND		1	0.13717		2	0.126082			ND		3	0.393488		4	0.137575
		ND		1	0.140287		2	0.112818			ND		3	0.42531		4	0.166983
		ND		1	0.140152		2	0.121694			ND		3	0.435715		4	0.146353
		ND		1	0.132455		2	0.131527			ND		3	0.440707		4	0.152333
		ND		1	0.140258		2	0.129905			ND		3	0.428435		4	0.159904
		ND		1	0.134301		2	0.123047			ND		3	0.424822		4	0.135409
		ND		1	0.155127		2	0.119587			ND		3	0.429689		4	0.140969
		ND		1	0.148593		2	0.137813			ND		3	0.417724		4	0.148011
				Mean	0.152268		Mean	0.13211					Mean	0.41519		Mean	0.158647
				SD	0.0186875		SD	0.0124573					SD	0.0385047		SD	0.0144926
					0.000559474
			Different letters of ALP enzymes in the same column indicate significant differences among different organs（Table 1 Analysis）
			1	2	3	4				Mean±SD
		1								0.42±0.04	Stomach	a
		2	**							0.16±0.01	intestine	b
		3	**	**						0.15±0.01	Hepatopancreas	b
		4	/	**	**					0.13±0.01	Gill	c
			The exact p-value of ALP enzymes (Two-tailed independent Student’s T tests were employed for comparisons)
		p value	1	2	3	4
		1
		2	0.000559474
		3	4.7083e-24	6.82523e-26
		4	0.260379	1.19124e-06	2.89889e-24
									/
					LSD	1	2	.02016*		0.012
							3	-.26292*		0				1	2	3	4
							4	-0.00638		0.417			1
						2	1	-.02016*		0.012			2	**
							3	-.28308*		0			3	**	**
							4	-.02654*		0.001			4	/	**	**
						3	1	.26292*		0
							2	.28308*		0
							4	.25654*		0
						4	1	0.00638		0.417			3	胃	a
							2	.02654*		0.001			4	肠	b
							3	-.25654*		0			1	肝	b
													2	腮	c

## Sheet: Distribution-ATPase
								Distribution of ATPase enzymes in Misgurnus anguillicaudatus (Mean ± SD, N = 18)（Table 1 Analysis）
		Heart	Control MOD		Hepatopancreas	Control MOD		Gill	Control MOD		Kidney	Control MOD		Stomach	Control MOD		intestine	Control MOD
		1	0.891157		2	0.688024		3	0.51973		4	0.229567		5	0.631733		6	0.310903
		1	0.918131		2	0.702345		3	0.504828		4	0.224511		5	0.674796		6	0.339479
		1	0.912029		2	0.730924		3	0.540824		4	0.225553		5	0.600452		6	0.31345
		1	0.928803		2	0.636334		3	0.535322		4	0.370666		5	0.709887		6	0.362246
		1	0.833344		2	0.701092		3	0.519973		4	0.315073		5	0.612434		6	0.379765
		1	0.912421		2	0.696908		3	0.557048		4	0.305652		5	0.628319		6	0.393264
		1	0.986039		2	0.746094		3	0.509811		4	0.258494		5	0.663119		6	0.360818
		1	0.873148		2	0.706404		3	0.546162		4	0.269018		5	0.615518		6	0.376567
		1	0.941336		2	0.647288		3	0.540605		4	0.284248		5	0.626898		6	0.415314
		1	0.823661		2	0.666281		3	0.498021		4	0.224145		5	0.590011		6	0.368753
		1	0.824561		2	0.689695		3	0.524273		4	0.199237		5	0.597349		6	0.376616
		1	0.78857		2	0.565503		3	0.466064		4	0.224145		5	0.630755		6	0.380387
		1	0.840134		2	0.63963		3	0.522518		4	0.24656		5	0.679693		6	0.339685
		1	0.80807		2	0.731077		3	0.527902		4	0.21916		5	0.659302		6	0.383391
		1	0.74128		2	0.605088		3	0.555729		4	0.24656		5	0.652505		6	0.349356
		1	0.867435		2	0.622057		3	0.494028		4	0.241629		5	0.603322		6	0.379582
		1	0.850086		2	0.723035		3	0.488593		4	0.225735		5	0.652505		6	0.362978
		1	0.772799		2	0.611072		3	0.461403		4	0.253957		5	0.613151		6	0.351641
		Mean	0.861834		Mean	0.672714		Mean	0.51738		Mean	0.25355		Mean	0.635653		Mean	0.363567
		SD	0.0643908		SD	0.0509771		SD	0.0278766		SD	0.0423568		SD	0.032827		SD	0.0264689
			Different letters of ATPase enzymes in the same column indicate significant differences among different organs（Table 1 Analysis）
			1	2	3	4	5	6		Mean±SD
		1								0.86±0.06	1	Heart	a
		2	**							0.67±0.05	2	Hepatopancreas	b
		3	**	**						0.64±0.03	5	Stomach	c
		4	**	**	**					0.52±0.03	3	Gill	d
		5	**	*	**	**				0.36±0.03	6	intestine	e
		6	**	**	**	**	**			0.25±0.04	4	Kidney	f
			The exact p-value of ATPase enzymes (Two-tailed independent Student’s T tests were employed for comparisons)
		p value	1	2	3	4	5	6
		1
		2	2.11057e-11
		3	6.20475e-21	4.21006e-13
		4	1.28587e-27	1.83145e-24	9.8107e-22
		5	5.2077e-15	0.0139196	2.02573e-13	3.63876e-26
		6	3.21795e-26	3.33072e-22	3.57404e-18	6.41908e-11	9.54354e-25

## Sheet: Distribution-NSE
						Distribution of NSE enzymes in Misgurnus anguillicaudatus (Mean ± SD, N = 18)（Table 1 Analysis）
	Heart	Control MOD		Hepatopancreas	Control MOD		Gill	Control MOD		Kidney	Control MOD		Stomach	Control MOD		intestine	Control MOD
	1	0.100332		2	0.208754		3	0.179566		4	0.127614		5	0.195059		6	0.0941777
	1	0.101924		2	0.223172		3	0.170444		4	0.134756		5	0.183762		6	0.0957458
	1	0.103655		2	0.203087		3	0.14239		4	0.13065		5	0.185901		6	0.0983755
	1	0.0950001		2	0.232332		3	0.129126		4	0.103543		5	0.238858		6	0.109652
	1	0.102493		2	0.236086		3	0.12181		4	0.130574		5	0.229302		6	0.116191
	1	0.0873124		2	0.230169		3	0.133869		4	0.130641		5	0.237988		6	0.119604
	1	0.0813288		2	0.18755		3	0.140904		4	0.158761		5	0.202389		6	0.107752
	1	0.122405		2	0.174735		3	0.149237		4	0.127966		5	0.202365		6	0.115421
	1	0.0998089		2	0.19502		3	0.146654		4	0.126591		5	0.192764		6	0.11932
	1	0.0888		2	0.22736		3	0.12461		4	0.12125		5	0.165651		6	0.126549
	1	0.0894104		2	0.222759		3	0.130746		4	0.120028		5	0.173556		6	0.113821
	1	0.0910398		2	0.216599		3	0.132448		4	0.119294		5	0.182535		6	0.124409
	1	0.103008		2	0.247823		3	0.129268		4	0.120191		5	0.175053		6	0.127701
	1	0.109161		2	0.242808		3	0.136822		4	0.133375		5	0.187183		6	0.127815
	1	0.105606		2	0.234181		3	0.143559		4	0.138101		5	0.176192		6	0.122753
	1	0.0992334		2	0.229442		3	0.122118		4	0.118989		5	0.175827		6	0.130106
	1	0.112279		2	0.223097		3	0.128131		4	0.122342		5	0.187584		6	0.120676
	1	0.118985		2	0.245258		3	0.125607		4	0.141108		5	0.202445		6	0.133165
	Mean	0.100655		Mean	0.221124		Mean	0.138184		Mean	0.128099		Mean	0.194134		Mean	0.116846
	SD	0.0108637		SD	0.0202128		SD	0.0157947		SD	0.0115668		SD	0.0217267		SD	0.0117353
		Different letters of NSE enzymes in the same column indicate significant differences among different organs（Table 1 Analysis）
			1	2	3	4	5	6	Mean±SD
		1							0.22±0.02	2	Hepatopancreas	a
		2	**						0.19±0.02	5	Stomach	b
		3	**	**					0.14±0.02	3	Gill	c
		4	**	**	*				0.13±0.01	4	Kidney	d
		5	**	**	**	**			0.12±0.01	6	intestine	e
		6	**	**	**	**	**		0.10±0.01	1	Heart	f
		The exact p-value of NSE enzymes (Two-tailed independent Student’s T tests were employed for comparisons)
		p value	1	2	3	4	5	6
		1
		2	7.37418e-22
		3	1.07684e-09	2.03387e-15
		4	1.67669e-08	3.76402e-18	0.03583
		5	1.1689e-17	0.000484495	2.50342e-10	3.82995e-13
		6	0.000137681	1.24512e-19	5.62487e-05	0.00654199	5.18536e-15

## Sheet: Distribution-POX
						Distribution of POX enzymes in Misgurnus anguillicaudatus (Mean ± SD, N = 18)（Table 1 Analysis）
		Heart	Control MOD		Hepatopancreas	Control MOD		Gill	Control MOD		Kidney	Control MOD		Stomach	Control MOD		intestine	Control MOD
		1	0.204915		2	0.202062		3	0.273858		4	0.628917		5	0.131156		6	0.132723
		1	0.21779		2	0.201087		3	0.224003		4	0.614811		5	0.133141		6	0.123266
		1	0.211228		2	0.207761		3	0.241541		4	0.543682		5	0.122735		6	0.12207
		1	0.228379		2	0.196947		3	0.223903		4	0.592398		5	0.169529		6	0.103406
		1	0.241461		2	0.193856		3	0.25291		4	0.626566		5	0.152015		6	0.103855
		1	0.211092		2	0.190646		3	0.273325		4	0.66662		5	0.151542		6	0.102711
		1	0.202773		2	0.174466		3	0.203173		4	0.649676		5	0.131188		6	0.113266
		1	0.210698		2	0.168419		3	0.205824		4	0.603901		5	0.142231		6	0.103385
		1	0.186942		2	0.179894		3	0.253943		4	0.654812		5	0.151553		6	0.110436
		1	0.187306		2	0.136559		3	0.19318		4	0.614393		5	0.141791		6	0.137467
		1	0.200935		2	0.136559		3	0.225978		4	0.588409		5	0.144871		6	0.155361
		1	0.18142		2	0.15538		3	0.194819		4	0.553064		5	0.138757		6	0.161047
		1	0.191052		2	0.13929		3	0.197044		4	0.628681		5	0.144627		6	0.140216
		1	0.204953		2	0.13929		3	0.210497		4	0.602177		5	0.147769		6	0.158468
		1	0.185048		2	0.158488		3	0.198716		4	0.566125		5	0.141532		6	0.164268
		1	0.198724		2	0.135057		3	0.203492		4	0.580837		5	0.143278		6	0.153652
		1	0.179424		2	0.153671		3	0.192676		4	0.54588		5	0.137231		6	0.159275
		1	0.18895		2	0.137758		3	0.194877		4	0.620665		5	0.143036		6	0.138673
		Mean	0.201838		Mean	0.167066		Mean	0.220209		Mean	0.604534		Mean	0.142666			0.132419
		SD	0.0166777		SD	0.0266826		SD	0.0277252		SD	0.0366131		SD	0.0102936			0.0227007
			Different letters of POX enzymes in the same column indicate significant differences among different organs（Table 1 Analysis）
				1	2	3	4	5	6		Mean±SD
			1								0.60±0.04	4	Kidney	a
			2	**							0.22±0.03	3	Gill	b
			3	*	**						0.20±0.02	1	Heart	c
			4	**	**	**					0.17±0.03	2	Hepatopancreas	d
			5	**	**	**	**				0.14±0.01	5	Stomach	e
			6	**	**	**	**	/			0.13±0.02	6	intestine	e
			The exact p-value of POX enzymes (Two-tailed independent Student’s T tests were employed for comparisons)
			p value	1	2	3	4	5	6
			1
			2	4.33822e-05
			3	0.0215674	1.3112e-06
			4	4.79618e-31	1.58902e-30	1.85238e-28
			5	1.44582e-14	0.000948475	7.11819e-13	7.39343e-34
			6	3.68126e-12	0.000184029	4.29311e-12	2.31246e-32	0.0901795

## Sheet: Distribution-SDH
						Distribution of SDH enzymes in Misgurnus anguillicaudatus (Mean ± SD, N = 18)（Table 1 Analysis）
	Heart	Control MOD		Hepatopancreas	Control MOD		Gill	Control MOD		Kidney	Control MOD		Stomach	Control MOD		intestine	Control MOD
	1	0.333708		2	0.184099			ND			ND		3	0.137502		4	0.112825
	1	0.364102		2	0.18519			ND			ND		3	0.12172		4	0.0619863
	1	0.339958		2	0.165153			ND			ND		3	0.118016		4	0.073044
	1	0.37111		2	0.129104			ND			ND		3	0.11246		4	0.0998385
	1	0.411855		2	0.132927			ND			ND		3	0.10023		4	0.0979878
	1	0.386141		2	0.158585			ND			ND		3	0.0869856		4	0.132358
	1	0.381715		2	0.134527			ND			ND		3	0.106281		4	0.0714105
	1	0.404971		2	0.160563			ND			ND		3	0.104198		4	0.10004
	1	0.389051		2	0.113351			ND			ND		3	0.0910126		4	0.148268
	1	0.350721		2	0.18309			ND			ND		3	0.14202		4	0.0935216
	1	0.388863		2	0.205142			ND			ND		3	0.149334		4	0.122059
	1	0.371427		2	0.185028			ND			ND		3	0.1475		4	0.120246
	1	0.358566		2	0.199557			ND			ND		3	0.147541		4	0.123218
	1	0.346614		2	0.192905			ND			ND		3	0.142623		4	0.129532
	1	0.378486		2	0.210643			ND			ND		3	0.155738		4	0.127088
	1	0.314741		2	0.175166			ND			ND		3	0.129508		4	0.117312
	1	0.346614		2	0.192905			ND			ND		3	0.142623		4	0.119756
	1	0.390438		2	0.217295			ND			ND		3	0.160656		4	0.122444
	Mean	0.368282		Mean	0.173624								Mean	0.127553		Mean	0.109607
	SD	0.0259359		SD	0.0301182								SD	0.0230173		SD	0.0232
		Different letters of SDH enzymes in the same column indicate significant differences among different organs（Table 1 Analysis）
			1	2	3	4		Mean±SD
		1						0.37±0.03	1	Heart	a
		2	**					0.17±0.03	2	Hepatopancreas	b
		3	**	**				0.13±0.02	3	Stomach	c
		4	**	**	*			0.11±0.02	4	intestine	d
		The exact p-value of SDH enzymes (Two-tailed independent Student’s T tests were employed for comparisons)
		p value	1	2	3	4
		1
		2	6.68646e-21
		3	8.74538e-26	1.07638e-05
		4	9.25748e-27	2.93738e-08	0.0258985
