# Supplementary material for: The effects of the heavy metals cadmium and lead on six metabolic and immune-related enzymes in the loach (Misgurnus anguillicaudatus)
Source: PeerJ. 2026 Jan 7;14:e20547. doi: 10.7717/peerj.20547 (PMC12790279; doi:10.7717/peerj.20547)
Supplement: Supplemental Information 2 — ACP, acid phosphatase; ALP, alkaline phosphatase; ATPase, adenosine triphosphatase; MOD, mean optical density; NSE, non-specific esterase; POX, peroxidase; SD, standard deviation; SDH, succinate dehydrogenase. Data expressed as mean ± SD, n = 9. [file peerj-14-20547-s002.xlsx]

## Sheet: Measurement MOD of Cd 
Measurement of the mean optical density of POX enzymes in the visceral organs of Misgurnus anguillicaudatus exposed to Cd（Figure 2 data）
POX	Heart	Low(3.625 mg/L)	Medium(7.25 mg/L)	High(14.5 mg/L)	Hepatopancreas	Low(3.625 mg/L)	Medium(7.25 mg/L)	High(14.5 mg/L)	Gill	Low(3.625 mg/L)	Medium(7.25 mg/L)	High(14.5 mg/L)	Kidney	Low(3.625 mg/L)	Medium(7.25 mg/L)	High(14.5 mg/L)	Stomach	Low(3.625 mg/L)	Medium(7.25 mg/L)	High(14.5 mg/L)	Intestine	Low(3.625 mg/L)	Medium(7.25 mg/L)	High(14.5 mg/L)
IOD	691.594	1504.4	696.072	1135.52	95.5244	56.7173	4017.81	688.854	40.799	133.074	42.0401	16.1506	9924.9	871.334	190.973	24.2039	36.1768	17.9326	45.9358	42.3175	45.3601	123.536	20.4398	113.099
AREA	3692.33	7924.07	4650.24	7924.07	699.509	442.138	28660.9	5183.44	211.196	881.495	273.192	102.503	16154	1904.06	554.601	96.9259	255.141	124.092	313.659	276.638	329.972	801.262	120.174	798.262
Mean IOD	0.187306	0.189852	0.149685	0.1433	0.136559	0.128279	0.140184	0.132895	0.19318	0.150964	0.153885	0.157562	0.614393	0.457619	0.344342	0.249716	0.141791	0.144511	0.146451	0.152971	0.137467	0.154176	0.170084	0.141681
IOD	1720.88	249.188	684.135	233.319	75.7807	912.579	309.076	738.571	106.183	303.493	9.77816	33.7026	2135.63	745.975	7024.27	4.01961	24.8587	22.268	41.7918	48.8622	109.835	114.405	36.5035	143.679
AREA	8564.38	1473.12	3879.7	1473.12	554.929	5813.61	2281.76	5950.7	469.88	1528.41	63.7433	201.724	3629.5	1511.6	16806.2	15.2325	171.592	172.699	263.401	288.96	706.967	848.767	245.295	848.767
Mean IOD	0.200935	0.169157	0.176337	0.158384	0.136559	0.156973	0.135455	0.124115	0.225978	0.198568	0.153399	0.167073	0.588409	0.493501	0.417956	0.263883	0.144871	0.128941	0.158663	0.169097	0.155361	0.134789	0.148815	0.169279
IOD	1029.63	496.672	620.864	463.474	67.9271	123.541	261.872	2630.63	31.5133	196.648	10.9079	19.0569	8991.71	4621.11	62.008	99.4698	39.0293	39.3451	43.3962	30.5434	34.0634	196.797	25.71	194.748
AREA	5675.39	3241.02	4206.74	3241.02	437.167	937.839	1674.59	18403	161.756	1072.81	77.4775	124.542	16258	11227.7	165.672	361.222	281.277	255.9	313.659	224.912	211.512	1278.98	153.616	1278.98
Mean IOD	0.18142	0.153245	0.147588	0.143003	0.15538	0.131729	0.15638	0.142946	0.194819	0.183302	0.140788	0.153015	0.553064	0.411583	0.374282	0.27537	0.138757	0.153752	0.138354	0.135802	0.161047	0.15387	0.167366	0.152269
IOD	4.8774	23.2876	181.722	418.898	12.2297	5.40826	32.0769	3.34959	6.85945	24.731	11.2057	7.03121	20.3774	2420.44	3605.02	15.1734	21.6941	149.022	51.3868	514.851	35.755	29.8793	104.785	63.1531
AREA	25.5292	152.023	1188.67	2862	87.8	41.3333	224.333	24.7105	34.8118	121.25	71.3913	43.75	32.413	5185.5	10264	59.5714	150	1011	344	3298	255	190	604	437
Mean IOD	0.191052	0.153185	0.152879	0.146366	0.13929	0.130845	0.142988	0.135553	0.197044	0.203967	0.156962	0.160713	0.628681	0.466771	0.351229	0.25471	0.144627	0.147401	0.14938	0.15611	0.140216	0.15726	0.173486	0.144515
IOD	6.16368	16.148	592.831	266.873	19.1176	2.03584	69.3583	3.12354	19.9183	45.7518	10.7415	11.4178	1134.5	8.02597	1351.45	33.3261	20.5099	156.683	55.8334	517.677	41.3602	25.9846	86.9763	76.6633
AREA	30.0736	106	3713	1888	137.25	16.8333	502	24.6731	94.625	225.909	68.65	67	1884	15.9444	3170.08	123.815	130	1030	345	3000	261	189	573	444
Mean IOD	0.204953	0.15234	0.159664	0.141352	0.13929	0.120941	0.138164	0.126597	0.210497	0.202523	0.156467	0.170414	0.602177	0.503371	0.426315	0.269161	0.157769	0.15212	0.161836	0.172559	0.158468	0.137485	0.151791	0.172665
IOD	4.24016	13.3295	252.941	91.07	18.9789	6.88055	19.2394	3.25518	5.61956	56.9737	4.83799	37.4972	1061.48	350.469	1319.65	34.4008	25.7589	160.277	105.136	204.709	30.8823	29.3492	59.3809	66.9403
AREA	22.9138	85.1667	1678	623.5	119.75	51.2083	149.25	22.3256	28.2794	304.75	29.5714	240.25	1875	834.818	3456.7	122.476	182	1022	745	1477	188	187	394	431
Mean IOD	0.185048	0.15651	0.15074	0.146063	0.158488	0.134364	0.128907	0.145805	0.198716	0.186952	0.163604	0.156076	0.566125	0.419814	0.381767	0.280877	0.141532	0.156827	0.141122	0.138598	0.164268	0.156948	0.150713	0.155314
IOD	8.07322	22.6275	179.383	57.3485	13.9109	6.24745	38.611	4.09085	4.50157	23.7896	5.71194	29.0814	1180.84	8002.43	8.83951	4279.03	24.0706	189.462	140.441	181.783	34.879	57.5884	60.3429	41.3521
AREA	40.6252	153.504	1161	342.333	103	42.4231	250.778	23.2766	22.1216	121.133	37.65	176	2033	16396	21.3846	16396	168	1102	895	1235	227	432	410	247
Mean IOD	0.198724	0.147406	0.154507	0.167523	0.135057	0.147265	0.153965	0.17575	0.203492	0.196392	0.151712	0.165235	0.580837	0.488072	0.413359	0.26098	0.143278	0.171926	0.156917	0.147193	0.153652	0.133306	0.147178	0.167417
IOD	33.9129	71.1813	418.436	33.3043	51.4798	2.8361	13.0009	5.23082	5.98117	9.47567	4.85481	16.9129	1042.08	2931.82	735.517	1961.54	30.1537	174.87	120.96	154.806	37.9075	61.0233	38.8983	38.1002
AREA	189.009	470	2385	235.667	335	21.7692	86.7333	37	31.0425	52.2667	34.8667	88.3953	1909	7202.5	1987	7202.5	237	1150	884	1153	238	401	235	253
Mean IOD	0.179424	0.15145	0.175445	0.141319	0.153671	0.13028	0.149895	0.141374	0.192676	0.181295	0.139239	0.191332	0.54588	0.407055	0.370165	0.272341	0.127231	0.152061	0.136833	0.134264	0.159275	0.152178	0.165525	0.150594
IOD	46.5058	99.766	303.383	407.004	9.36756	2.83255	20.0374	3.07478	6.40494	8.19603	26.804	4.23373	1165.61	282.486	68.1638	11.021	49.0615	143.155	132.225	190.775	35.9164	62.0564	12.2678	62.1726
AREA	246.127	659	2008	2472	68	21.8889	141.692	22.9355	32.8667	42.625	172.667	26.6364	1878	611.923	196.231	43.75	343	982	895	1236	259	399	71.5	435
Mean IOD	0.18895	0.15139	0.151087	0.164646	0.137758	0.129406	0.141415	0.134062	0.194877	0.192282	0.155236	0.158946	0.620665	0.461637	0.347366	0.251908	0.143036	0.145779	0.147737	0.154349	0.138673	0.15553	0.171578	0.142925
Mean	0.190868	0.158282	0.157548	0.150217	0.143561	0.134454	0.143039	0.1399	0.201253	0.188472	0.152366	0.164485	0.588914	0.456603	0.380753	0.264327	0.142544	0.150368	0.148588	0.151216	0.152047	0.148394	0.160726	0.155184
SD	0.00888786	0.0133098	0.0109429	0.010393	0.00938898	0.0109277	0.00891717	0.0152467	0.0108784	0.0162177	0.00776715	0.0115016	0.0298676	0.0362353	0.0316034	0.0109263	0.00784811	0.0114407	0.00902059	0.0137499	0.0104211	0.0100757	0.0108442	0.0118845
Mean±SD	0.19±0.01	0.16±0.01	0.16±0.01	0.15±0.01	0.14±0.01	0.13±0.01	0.14±0.01	0.14±0.02	0.20±0.01	0.19±0.02	0.15±0.01	0.16±0.01	0.59±0.03	0.46±0.04	0.38±0.03	0.26±0.01	0.14±0.01	0.15±0.01	0.15±0.01	0.15±0.01	0.15±0.01	0.15±0.01	0.16±0.01	0.16±0.01
Measurement of the mean optical density of NSE enzymes in the visceral organs of Misgurnus anguillicaudatus exposed to Cd（Figure 2 data）
NSE	Heart	Low(3.625 mg/L)	Medium(7.25 mg/L)	High(14.5 mg/L)	Hepatopancreas	Low(3.625 mg/L)	Medium(7.25 mg/L)	High(14.5 mg/L)	Gill	Low(3.625 mg/L)	Medium(7.25 mg/L)	High(14.5 mg/L)	Kidney	Low(3.625 mg/L)	Medium(7.25 mg/L)	High(14.5 mg/L)	Stomach	Low(3.625 mg/L)	Medium(7.25 mg/L)	High(14.5 mg/L)	Intestine	Low(3.625 mg/L)	Medium(7.25 mg/L)	High(14.5 mg/L)
IOD	6.28535	32.9613	50.2749	39.6219	14640.7	984.427	4242.5	1101.14	721.255	303.5	336.974	670.332	934.637	33.2824	1835.51	106.933	16241.7	2044.89	336.566	345.71	794.951	233.767	636.677	784.452
AREA	70.7809	314.288	536.135	333.165	64394.1	4660.13	21431.3	6152.58	5788.1	2585.75	2650.7	4375.27	7708.32	265.711	16006.4	960.39	98047.8	12753.3	2582.02	2582.02	6281.75	1777.42	4823.33	6220.33
Mean IOD	0.0888	0.104876	0.0937729	0.118926	0.22736	0.211245	0.197958	0.178972	0.12461	0.117374	0.127126	0.153209	0.12125	0.125258	0.114674	0.111343	0.165651	0.160342	0.13035	0.133891	0.126549	0.13152	0.131999	0.126111
IOD	43.3854	20.08	142.277	95.1375	19980.3	5031.28	1407.07	4569.66	546.521	308.176	436.402	250.889	578.652	30.629	740.785	118.967	10872.3	596.92	1785.28	1756.57	1905.4	236.414	769.589	789.428
AREA	485.238	206.346	1194.94	869.378	89694.4	24904.1	7169.15	30006.3	4180.02	2359.96	3453.82	1929.04	4820.97	265.711	6086.68	818.354	62644.4	3547.27	13503.8	13503.8	16740.4	1911.44	6261.54	6892.42
Mean IOD	0.0894104	0.0973123	0.119067	0.109432	0.222759	0.202026	0.196267	0.15229	0.130746	0.130585	0.126354	0.130059	0.120028	0.115272	0.121706	0.145373	0.173556	0.168276	0.132206	0.13008	0.113821	0.123684	0.122907	0.114536
IOD	25.9698	93.7149	13.2555	113.21	5921.93	2616.16	4533.11	5769.13	912.088	298.67	575.696	592.898	1828.87	32.5216	1798.32	193.443	6170.83	706.06	2864.24	2564.16	563.402	275.722	776.75	164.26
AREA	285.257	967.158	140.605	1150.77	27340.5	11625.1	21431.3	33341.2	6886.38	2396.24	4026.09	4375.27	15330.8	265.711	13439.8	1673.74	33806.2	3940.96	18840.3	18840.3	4528.64	2228.97	5752.69	1320.37
Mean IOD	0.0910398	0.0968972	0.0942748	0.0983776	0.216599	0.225045	0.211518	0.173033	0.132448	0.124641	0.142991	0.135511	0.119294	0.122395	0.133806	0.115575	0.182535	0.179159	0.152027	0.1361	0.124409	0.1237	0.135024	0.124405
IOD	90.029	32.7967	48.5143	29.6119	412.13	756.294	716.849	423.712	469.889	414.456	707.012	427.836	16.9469	302.8	10.8558	162.588	1689.09	877.229	1090.82	892.908	1196.17	591.254	936.427	985.874
AREA	874	298	446	286	1663	3291	3325	2172	3635	3337	5634	2860	141	2503	93	1425	9649	5423	7849	6659	9367	4455	7029	7029
Mean IOD	0.103008	0.110056	0.108777	0.103538	0.247823	0.229807	0.215594	0.195079	0.129268	0.1242	0.12549	0.149593	0.120191	0.120975	0.116729	0.114097	0.175053	0.161761	0.138976	0.13409	0.127701	0.132717	0.133223	0.140258
IOD	75.43	30.0808	47.9598	30.8529	1213.55	743.881	703.24	464.623	592.028	671.834	316.159	232.823	38.5455	298.163	9.69746	92.4705	1148.37	597.145	2048.12	1475.19	1173.47	942.638	558.179	658.864
AREA	691	297	456	282	4998	3385	3290	2799	4327	5213	2265	1721	289	2164	77	755	6135	3331	14539	10652	9181	7674	4186	4186
Mean IOD	0.109161	0.101282	0.105175	0.109408	0.242808	0.219758	0.213751	0.165996	0.136822	0.128877	0.139585	0.135284	0.133375	0.137783	0.125941	0.122478	0.187183	0.179269	0.14087	0.138489	0.127815	0.122835	0.133344	0.157397
IOD	83.3233	26.7274	51.0706	34.2354	577.959	774.721	913.032	613.269	445.607	474.596	518.457	420.417	264.602	223.318	48.7938	108.584	895.762	1032.09	1247.94	489.219	795.929	1511.61	652.387	623.294
AREA	789	264	467	300	2468	3256	4192	3441	3104	3310	3737	2944	1916	1843	433	949	5084	5452	10178	3890	6484	13256	4848	4848
Mean IOD	0.105606	0.10124	0.109359	0.114118	0.234181	0.237937	0.217803	0.178224	0.143559	0.143383	0.138736	0.142805	0.138101	0.121171	0.112688	0.114419	0.176192	0.189304	0.122611	0.125763	0.122753	0.114032	0.134568	0.128567
IOD	36.8156	43.3033	64.944	58.2267	603.203	692.653	1330.9	735.209	589.463	365.209	226.742	812.365	355.182	371.271	14.2165	7.5785	896.366	1420.77	1044.47	654.12	1698.66	683.926	1074.72	1001.54
AREA	371	410	632	543	2629	3282	5995	3659	4827	3175	1820	5389	2985	3100	123	57	5098	8146	7815	4975	13056	5426	8577	8577
Mean IOD	0.0992334	0.105618	0.10276	0.107232	0.229442	0.211046	0.222002	0.200932	0.122118	0.115027	0.124584	0.150745	0.118989	0.119765	0.115581	0.132956	0.175827	0.174414	0.13365	0.131481	0.130106	0.126046	0.125303	0.116771
IOD	34.245	39.0481	81.6923	133.284	804.486	680.836	1404.22	13.0882	679.223	586.375	333.094	443.043	281.386	180.983	26.2611	7.57355	1485.29	1335.56	1772.41	865.468	1234.16	477.146	1442.58	1329.16
AREA	305	392	689	1181	3606	3144	5532	71	5301	4582	2489	3476	2300	1432	227	74	7918	7727	12010	6088	10227	3785	10480	10480
Mean IOD	0.112279	0.0996126	0.118566	0.112857	0.223097	0.216551	0.253836	0.184341	0.128131	0.127974	0.133826	0.127458	0.122342	0.126385	0.115688	0.102345	0.187584	0.172844	0.147577	0.14216	0.120676	0.126062	0.13765	0.126829
IOD	40.217	44.7741	74.2872	81.8084	969.503	744.27	402.573	43.6067	1100.94	207.994	319.845	383.017	295.622	236.922	32.1692	4.7744	1869.17	861.162	1540.83	758.621	1642.45	1070.98	1273.64	1463.69
AREA	338	375	648	686	3953	3423	1992	278	8765	1758	2496	3084	2095	2037	262	35	9233	5257	10233	5129	12334	9043	10491	10491
Mean IOD	0.118985	0.119398	0.114641	0.119254	0.245258	0.217432	0.202095	0.156859	0.125607	0.118313	0.128143	0.124195	0.141108	0.116309	0.122783	0.136412	0.202445	0.163812	0.150575	0.147908	0.133165	0.118432	0.121403	0.139519
Mean	0.101947	0.104032	0.107377	0.110349	0.232147	0.218983	0.214536	0.176192	0.130368	0.125597	0.131871	0.138762	0.126075	0.122812	0.119955	0.121666	0.18067	0.172131	0.13876	0.135551	0.125222	0.124336	0.130602	0.130488
SD	0.0107234	0.0071289	0.00937692	0.006842	0.0110534	0.0107963	0.0172669	0.0162252	0.00661652	0.00860876	0.00702482	0.0107492	0.0088637	0.00668538	0.00677494	0.0138489	0.0107183	0.00956278	0.00999023	0.00663788	0.00568968	0.00582946	0.00584407	0.0133088
Mean±SD	0.10±0.01	0.10±0.01	0.11±0.01	0.11±0.01	0.23±0.01	0.22±0.01	0.21±0.02	0.18±0.02	0.13±0.01	0.13±0.01	0.13±0.01	0.14±0.01	0.13±0.01	0.12±0.01	0.12±0.01	0.12±0.01	0.18±0.01	0.17±0.01	0.14±0.01	0.14±0.01	0.13±0.01	0.12±0.01	0.13±0.01	0.13±0.01
Measurement of the mean optical density of SDH enzymes in the visceral organs of Misgurnus anguillicaudatus exposed to Cd（Figure 2 data）
SDH	Heart	Low(3.625 mg/L)	Medium(7.25 mg/L)	High(14.5 mg/L)	Hepatopancreas	Low(3.625 mg/L)	Medium(7.25 mg/L)	High(14.5 mg/L)	Gill	Low(3.625 mg/L)	Medium(7.25 mg/L)	High(14.5 mg/L)	Kidney	Low(3.625 mg/L)	Medium(7.25 mg/L)	High(14.5 mg/L)	Stomach	Low(3.625 mg/L)	Medium(7.25 mg/L)	High(14.5 mg/L)	Intestine	Low(3.625 mg/L)	Medium(7.25 mg/L)	High(14.5 mg/L)
IOD	26721.7	3657.86	1950.78	276.005	2207.82	675.932	134.469	34.6391	ND				ND				118.994	67.7008	83.4902	138.584	21.3947	8.0094	10.1971	28.0039
AREA	76190.7	11448	6657.49	1664.3	12058.7	4109.85	1384.38	392.694									837.871	417.654	477.589	1405.83	228.768	75.7874	68.7684	228.768
Mean IOD	0.350721	0.319519	0.29302	0.165838	0.18309	0.164466	0.097133	0.088209									0.14202	0.162098	0.174816	0.098578	0.0935216	0.105682	0.148281	0.122412
IOD	7806.22	5097.49	2677.08	162.649	3765.25	364.383	74.8161	32.3508									110.988	114.617	105.739	154.713	14.8764	6.66621	8.27923	14.3199
AREA	20074.5	14942	9097.61	774.61	18354.3	1970.67	743.81	392.694									743.221	757.785	612.823	1565.78	121.879	54.9448	69.5996	121.879
Mean IOD	0.388863	0.341152	0.294262	0.209976	0.205142	0.184903	0.100585	0.0823816									0.149334	0.151253	0.172544	0.0988093	0.122059	0.121326	0.118955	0.117492
IOD	4077.12	4140.19	4262.51	140.285	2036.22	546.812	95.9073	83.2368									88.82	197.636	185.743	334.028	28.6682	7.75393	12.4224	24.6926
AREA	10976.9	11668	12533.7	666.81	11004.9	3377.4	1022.08	886.431									602.169	1233.51	1158.55	3412.06	238.413	67.0101	106.019	238.413
Mean IOD	0.371427	0.354833	0.340085	0.210382	0.185028	0.161903	0.0938359	0.093901									0.1475	0.160222	0.160324	0.0978963	0.120246	0.115713	0.117171	0.103571
IOD	5793.71	9091.47	5434.94	364.94	4670.82	7137.04	473.471	325.56									86.8983	1466.03	541.83	491.36	217.726	300.826	1224.09	913.274
AREA	16158	26760	17658	1832	23406	36569	4336	3197									588.978	11320	3938	6869	1767	2616.25	10693	6216
Mean IOD	0.358566	0.339741	0.307789	0.199203	0.199557	0.195166	0.109195	0.101833									0.147541	0.129508	0.13759	0.071533	0.123218	0.114984	0.114476	0.146923
IOD	8078.18	6606.69	5493.39	388.315	6414.85	11854.8	516.297	678.745									1956.22	2084.77	1341.58	172.29	232.725	194.278	40.1376	61.6994
AREA	23306	19677	18569	1839	33254	68545	4922.5	6288									13716	16304	10112	2219	1796.67	1684.8	389.583	501.308
Mean IOD	0.346614	0.335757	0.295837	0.211155	0.192905	0.172949	0.104885	0.107943									0.142623	0.127869	0.132672	0.077643	0.129532	0.115312	0.103027	0.123077
IOD	5582.29	2822.78	3842.33	4798.09	3931.44	2724.57	1079.44	386.876									1705.64	728.23	540.961	378.41	184.404	436.189	615.353	351.732
AREA	14749	9289	12017	23160	18664	17554	9510	3653									10952	6346	3796	5005	1451	3494	6066.5	2894
Mean IOD	0.378486	0.303884	0.319741	0.207171	0.210643	0.155211	0.113506	0.105906									0.155738	0.114754	0.142508	0.0756063	0.127088	0.124839	0.101435	0.121538
IOD	5481.53	3087.04	3909.37	1444.02	3114.46	2966.51	463.759	672									1505.92	1025.36	965.188	377.437	841.007	60.3046	121.302	52.6523
AREA	17416	9002	13395	7551	17780	15063	4483	6874									11628	7838	7366	5595	7169	502.909	1049	475.333
Mean IOD	0.314741	0.342928	0.291853	0.191235	0.175166	0.19694	0.103448	0.0977597									0.129508	0.13082	0.131033	0.0674597	0.117312	0.119911	0.115635	0.110769
IOD	7588.06	5080.5	1654.48	580.191	3867.93	3318.7	637.141	507.464									1108.28	740.287	1237.55	304.811	53.103	236.773	298.109	208.851
AREA	21892	15690	5828	2972	20051	16087	6335	5085									7770.67	6021	9687	4386	443.428	1824.6	2743	1939.33
Mean IOD	0.346614	0.323805	0.283884	0.195219	0.192905	0.206297	0.100575	0.0997963									0.142623	0.122951	0.127754	0.0694963	0.119756	0.129767	0.10868	0.107692
IOD	9543.09	5406.43	3605.2	1112.38	11072.3	4246.98	507.74	540.488									740.543	530.86	363.945	244.981	61.124	345.936	470.876	423.465
AREA	24442	16394	12664	5573	50955	21275	5034	5297									4609.5	4233	2841.5	3415	499.2	2925	3598.5	3740
Mean IOD	0.390438	0.329781	0.284681	0.199602	0.217295	0.199623	0.100862	0.102037									0.160656	0.12541	0.128082	0.0717367	0.122444	0.118269	0.130853	0.113226
Mean	0.360719	0.332378	0.301239	0.198865	0.195748	0.18194	0.102669	0.0977518									0.146394	0.136098	0.145258	0.0809732	0.119464	0.118423	0.117613	0.118522
SD	0.0242954	0.0150649	0.0183816	0.0143138	0.0137103	0.0187642	0.00598136	0.00830429									0.00890638	0.0172094	0.0189529	0.0134309	0.0104134	0.00681634	0.0145168	0.0126572
Mean±SD	0.36±0.02	0.33±0.02	0.30±0.02	0.20±0.01	0.20±0.01	0.18±0.02	0.10±0.01	0.10±0.01									0.15±0.01	0.14±0.02	0.15±0.02	0.08±0.01	0.12±0.01	0.12±0.01	0.12±0.01	0.12±0.01
Measurement of the mean optical density of ACP enzymes in the visceral organs of Misgurnus anguillicaudatus exposed to Cd（Figure 2 data）
ACP	Heart	Low(3.625 mg/L)	Medium(7.25 mg/L)	High(14.5 mg/L)	Hepatopancreas	Low(3.625 mg/L)	Medium(7.25 mg/L)	High(14.5 mg/L)	Gill	Low(3.625 mg/L)	Medium(7.25 mg/L)	High(14.5 mg/L)	Kidney	Low(3.625 mg/L)	Medium(7.25 mg/L)	High(14.5 mg/L)	Stomach	Low(3.625 mg/L)	Medium(7.25 mg/L)	High(14.5 mg/L)	Intestine	Low(3.625 mg/L)	Medium(7.25 mg/L)	High(14.5 mg/L)
IOD	101.55	24.9046	103.306	16.176	256.811	2976.36	659.847	172.06	93.8534	286.515	275.756	440.976	100.571	25.0217	24.6822	203.88	2999.96	5141.53	381.523	1389.99	1800.44	1971.53	1434.3	688.124
AREA	577.249	138.689	1044.77	138.689	752.64	7629.75	2477.43	752.64	232.942	720.49	824.12	1114.21	281.761	281.761	297.498	2170.11	5271.06	9316.01	653.607	4357.3	3498.9	3498.9	2765.78	1618.55
Mean IOD	0.175921	0.179571	0.0988788	0.116635	0.341213	0.3901	0.266344	0.228608	0.402905	0.397667	0.334607	0.395773	0.356935	0.0888047	0.0829658	0.0939491	0.569138	0.551902	0.583719	0.319002	0.514574	0.563471	0.51859	0.425149
IOD	93.4245	212.227	112.27	125.23	417.271	3747.31	1444.3	219.814	285.381	338.189	173.456	204.284	60.5696	17.4901	109.964	107.079	2686.13	1133	1005.63	1030.95	1766.37	1725.94	2204.83	1358.91
AREA	498.934	1249.99	1043.24	1249.99	1054.93	9782.72	5550.04	1054.93	623.156	888.03	594.043	542.982	196.944	196.944	1102.54	1139.73	5186.04	2222.53	1795.34	2767.38	3144.24	3144.24	4006.38	2897
Mean IOD	0.187248	0.169783	0.107617	0.100185	0.395544	0.383054	0.260232	0.208368	0.457961	0.380831	0.291993	0.376226	0.307547	0.0888074	0.0997375	0.0939509	0.517954	0.509779	0.560135	0.372536	0.561778	0.548922	0.550329	0.469074
IOD	72.989	52.0632	136.585	27.2397	491.982	1469.07	882.187	297.447	137.024	463.37	585.74	390.144	50.4364	17.8993	71.925	281.108	3889.76	3339.65	1650.25	246.25	1844.77	1974.55	1269.72	512.302
AREA	468.842	269.607	1102.2	269.607	1220.57	3979.28	3488.81	1220.57	363.775	1185.53	1822.63	961.202	156.425	156.425	764.52	3326.73	6694.32	5907.38	2788.63	763.519	3527.6	3527.6	2498.86	1271.43
Mean IOD	0.155679	0.193108	0.12392	0.101035	0.403077	0.36918	0.252862	0.243696	0.376672	0.390856	0.321371	0.405892	0.322431	0.114427	0.0940786	0.0844998	0.581054	0.565335	0.591779	0.32252	0.522954	0.559744	0.508119	0.402933
IOD	758.755	25.4505	113.522	97.5794	2125.26	2231.89	1486.5	341.43	391.205	596.105	1082.73	1330.43	429.998	49.0183	686.537	746.291	2704.22	4566.54	4213.17	3246.59	6361.56	6631.92	6342.61	1427.96
AREA	3997	138	954	1008	4802	6175	5354	1276	970	1665	3233	3359	1377	456	7292	7092	5003	8104	7190	9968	11927	11927	10969	4443
Mean IOD	0.189831	0.184424	0.118995	0.0968049	0.442579	0.361439	0.277642	0.267578	0.403304	0.358021	0.334898	0.396079	0.312272	0.107496	0.0941493	0.10523	0.54052	0.563492	0.585977	0.325701	0.533375	0.556043	0.57823	0.321395
IOD	1078.81	44.3953	24.2459	84.056	1189.14	1296.92	1200.78	505.287	1322.43	1399.21	2892.06	2216.04	157.843	52.095	225.838	211.095	2337.78	7609.8	6319.75	3814.63	4990.55	4911.78	1536.72	1661.06
AREA	5327	219	225	838	3174	3809	4106	2013	2618	3331	9096	5458	467	508	2006	2006	4500	14883	12146	10209	9735	9735	2993	4505
Mean IOD	0.202518	0.202718	0.107759	0.100305	0.374652	0.34049	0.292445	0.251012	0.505131	0.420057	0.317948	0.406016	0.337993	0.102549	0.112581	0.105232	0.519507	0.511308	0.520315	0.373654	0.51264	0.504548	0.513437	0.368714
IOD	764.594	373.485	61.063	81.3309	2935.05	208.917	1126.37	880.378	691.757	696.55	1494.25	897.219	1649.5	104.434	299.091	266.705	6286.05	8128.96	8402.58	3871.82	4612.24	4487.47	3329.05	573.941
AREA	4574	2063	492	804	6758	559	3942	3848	1665	1925	4265	2045	4655	799	2812	2812	10786	14336	14650	11969	8020	8020	5882	1798
Mean IOD	0.167161	0.18104	0.124112	0.101158	0.434307	0.373733	0.285734	0.228789	0.41547	0.361844	0.350352	0.438738	0.354351	0.130705	0.106362	0.0948452	0.582797	0.567031	0.573555	0.323487	0.575092	0.559535	0.565972	0.319211
IOD	345.316	152.033	47.687	167.187	1915.29	921.94	1010.64	942.609	765.094	2229.68	1089.48	1898.75	1744.26	651.765	75.3339	84.1677	5398.65	6369.04	5698.49	4695.67	6283.81	6550.87	6409.38	379.739
AREA	1874	935	469	1385	4410	2192	3537	4120	1669	5849	3728	5043	5944	4122	797	797	9958	11269	9533	14374	11746	11746	12329	1178
Mean IOD	0.184267	0.162602	0.101678	0.120713	0.434307	0.420593	0.285734	0.228789	0.458415	0.381208	0.292242	0.376512	0.293449	0.158119	0.0945218	0.105606	0.542142	0.565182	0.597765	0.326678	0.534975	0.557711	0.519862	0.322359
IOD	491.302	485.266	133.809	104.727	2970.1	1125.83	861.759	238.414	148.38	1176.91	2322.27	2319.97	3466.01	188.194	71.8738	67.1665	6673.53	4238.07	4052.44	1447.24	5888.8	6139.07	9793.62	814.959
AREA	2785	2731	1205	1016	7442	3352	3282	1134	372	3011	7002	5908	10224	1827	636	636	12348	7522	7161	4444	11042	11042	17538	2536
Mean IOD	0.17641	0.177688	0.111045	0.103078	0.3991	0.335868	0.262571	0.210242	0.398872	0.39087	0.331658	0.392682	0.339007	0.103007	0.113009	0.105608	0.540454	0.563423	0.565904	0.325661	0.533309	0.555975	0.558423	0.321356
IOD	545.742	128.123	208.72	142.465	2064.41	613.698	514.863	306.867	682.332	1207.59	1311.59	2735.02	3202.08	80.435	97.589	87.0034	7459.73	5799.57	4691.02	3404.69	10666.2	10497.9	5733.1	1022.32
AREA	3357	675	1624	1370	5076	1565	2018	1248	1505	3203	4531	7326	9840	990	914	914	14361	11344	8838	9113	20809	20809	10946	2773
Mean IOD	0.162568	0.189811	0.128522	0.103989	0.406701	0.392139	0.255135	0.245887	0.453377	0.377019	0.289471	0.373331	0.325414	0.0812475	0.106771	0.0951897	0.519444	0.511245	0.530779	0.373608	0.512577	0.504487	0.523762	0.368669
Mean	0.177956	0.182305	0.113614	0.104878	0.403498	0.374066	0.270967	0.234774	0.430234	0.384264	0.318282	0.395694	0.327711	0.108351	0.100464	0.0982344	0.54589	0.545411	0.56777	0.340317	0.533475	0.545604	0.537414	0.368762
SD	0.0146909	0.0120915	0.0106306	0.00813722	0.0320748	0.0264555	0.0146952	0.0192082	0.040698	0.018751	0.0222455	0.0203704	0.0213575	0.023914	0.0100091	0.00752256	0.0259505	0.0263362	0.0268736	0.0248156	0.022006	0.0236208	0.0259124	0.0542092
Mean±SD	0.18±0.01	0.18±0.01	0.11±0.01	0.10±0.01	0.40±0.03	0.37±0.03	0.27±0.01	0.23±0.02	0.43±0.04	0.38±0.02	0.32±0.02	0.40±0.02	0.33±0.02	0.11±0.02	0.10±0.01	0.10±0.01	0.55±0.03	0.55±0.03	0.57±0.03	0.34±0.02	0.53±0.02	0.55±0.02	0.54±0.03	0.37±0.05
Measurement of the mean optical density of ALP enzymes in the visceral organs of Misgurnus anguillicaudatus exposed to Cd（Figure 2 data）
ALP	Heart	Low(3.625 mg/L)	Medium(7.25 mg/L)	High(14.5 mg/L)	Hepatopancreas	Low(3.625 mg/L)	Medium(7.25 mg/L)	High(14.5 mg/L)	Gill	Low(3.625 mg/L)	Medium(7.25 mg/L)	High(14.5 mg/L)	Kidney	Low(3.625 mg/L)	Medium(7.25 mg/L)	High(14.5 mg/L)	Stomach	Low(3.625 mg/L)	Medium(7.25 mg/L)	High(14.5 mg/L)	Intestine	Low(3.625 mg/L)	Medium(7.25 mg/L)	High(14.5 mg/L)
IOD	ND				897.877	55.0936	44.7447	45.3539	17.7413	47.7453	7.73482	11.1052	ND				4132.46	298.875	287.253	94.4789	23.4498	14.141	16.8433	194.215
AREA					6598.62	381.588	314.216	412.453	144.765	398.044	65.7973	95.4672					8450.3	742.177	998.957	607.566	133.448	89.2533	141.243	1361.78
Mean IOD					0.13607	0.14438	0.142401	0.109961	0.122552	0.11995	0.117555	0.116325					0.489031	0.4027	0.287553	0.155504	0.175721	0.158437	0.119251	0.142619
IOD					169.554	39.036	131.977	16.3566	19.0949	33.5866	10.1495	9.04236					1089.76	229.854	238.984	215.101	20.8319	19.9796	18.9463	20.9498
AREA					1236.09	286.088	959.124	158.745	151.448	261.003	89.5206	85.5905					2769.48	595.5	843.208	1609.13	151.422	118.233	122.911	132.615
Mean IOD					0.13717	0.136447	0.137602	0.103037	0.126082	0.128683	0.113376	0.105647					0.393488	0.385985	0.283423	0.133675	0.137575	0.168985	0.154147	0.157974
IOD					535.788	53.9289	118.733	18.7073	15.618	31.029	5.85791	16.1186					1243.11	416.398	239.753	67.6724	20.3721	9.66842	42.711	29.6147
AREA					3819.23	371.663	837.185	155.315	138.436	244.945	51.7919	136.586					2922.83	1005.74	751.957	494.902	122.001	64.9823	290.412	173.242
Mean IOD					0.140287	0.145102	0.141824	0.120447	0.112818	0.126678	0.113105	0.118011					0.42531	0.414022	0.318839	0.136739	0.166983	0.148785	0.14707	0.170944
IOD					1091.65	239.773	242.933	138.404	485.621	1529.8	165.008	131.444					3646.06	2362.31	2239.53	1828.03	166.989	321.499	421.168	119.099
AREA					7789	2028	1516.5	1222	3990.5	10997	1412.71	1137.25					8368	5294	7059	10496	1141	2136	3717.67	752.625
Mean IOD					0.140152	0.118231	0.160193	0.11326	0.121694	0.13911	0.116802	0.115581					0.435715	0.446224	0.317259	0.174164	0.146353	0.150515	0.113288	0.158245
IOD					1025.86	46.4919	57.7158	27.2604	953.22	367.374	462.156	477.416					2036.95	5998.72	4369.37	1024.96	199.251	483.67	977.86	306.648
AREA					7745	350	430.864	272.75	7247.33	2875	4102.5	4382					4622	14032	13976	6846	1308	2602	5767	1764.67
Mean IOD					0.132455	0.132834	0.133954	0.0999464	0.131527	0.127782	0.112652	0.108949					0.440707	0.427503	0.312634	0.149716	0.152333	0.185884	0.169561	0.173771
IOD					171.396	34.0585	35.3962	166.729	252.146	724.469	1116.61	844.495					4451.87	7760.54	13750.3	1070.04	215.071	147.119	202.675	152.98
AREA					1222	235.667	242.853	1516.5	1941	5920	9326	7128					10391	16911	39030	6987	1345	1030	1435.5	932.2
Mean IOD					0.140258	0.14452	0.145752	0.109943	0.129905	0.122376	0.119731	0.118476					0.428435	0.458905	0.3523	0.153148	0.159904	0.142834	0.141188	0.164107
IOD					895.253	38.9243	65.9405	50.8437	2394.87	775.107	408.125	1381.59					3054.89	4614.48	3071.94	1689.1	191.062	406.148	244.431	269.709
AREA					6666	272.75	468.468	468.468	19463	6022	3599	11545					7191	10582	9899	9947	1411	2901.5	2320	1832.67
Mean IOD					0.134301	0.142711	0.140758	0.108532	0.123047	0.128713	0.1134	0.11967					0.424822	0.436068	0.310328	0.16981	0.135409	0.139979	0.105358	0.147167
IOD					801.385	74.8593	20.594	23.9668	786.644	1729.42	900.03	1478.28					1244.24	3318.71	3930.98	154.421	117.709	1690.69	125.208	102.281
AREA					5166	555	171.587	235.667	6578	13649	7619	12524					2895.67	7943	12854	1057.88	835	9780	794	632.9
Mean IOD					0.155127	0.134882	0.120021	0.101698	0.119587	0.126707	0.11813	0.118036					0.429689	0.417816	0.305818	0.145973	0.140969	0.172872	0.157692	0.161607
IOD					10.9959	150.791	20.2005	920.739	381.88	358.233	923.24	787.198					3999.29	5853.83	2015.45	588.317	168.436	1255.7	193.411	105.097
AREA					74	1458	144.095	7745	2771	2485	7058	6266					9574	13054	5850.5	3940	1138	9453	1473	688.625
Mean IOD					0.148593	0.103423	0.140188	0.118882	0.137813	0.144158	0.130808	0.12563					0.417724	0.448432	0.344492	0.149319	0.148011	0.132836	0.131304	0.152619
Mean					0.14049	0.133614	0.140299	0.109523	0.125003	0.129351	0.117284	0.116258					0.431658	0.426406	0.314738	0.152005	0.151473	0.155681	0.137651	0.158784
SD					0.00718958	0.014177	0.0105546	0.00722194	0.00733522	0.00765648	0.00569186	0.00588544					0.0253535	0.0235892	0.0227554	0.0134141	0.0136935	0.0173208	0.0218188	0.0102712
Mean±SD					0.14±0.01	0.13±0.01	0.14±0.01	0.11±0.01	0.13±0.01	0.13±0.01	0.12±0.01	0.12±0.01					0.43±0.03	0.43±0.02	0.31±0.02	0.15±0.01	0.15±0.01	0.16±0.02	0.14±0.02	0.16±0.01
Measurement of the mean optical density of ATP enzymes in the visceral organs of Misgurnus anguillicaudatus exposed to Cd（Figure 2 data）
ATP	Heart	Low(3.625 mg/L)	Medium(7.25 mg/L)	High(14.5 mg/L)	Hepatopancreas	Low(3.625 mg/L)	Medium(7.25 mg/L)	High(14.5 mg/L)	Gill	Low(3.625 mg/L)	Medium(7.25 mg/L)	High(14.5 mg/L)	Kidney	Low(3.625 mg/L)	Medium(7.25 mg/L)	High(14.5 mg/L)	Stomach	Low(3.625 mg/L)	Medium(7.25 mg/L)	High(14.5 mg/L)	Intestine	Low(3.625 mg/L)	Medium(7.25 mg/L)	High(14.5 mg/L)
IOD	142124	21499.7	12140.6	689.303	41227.2	110889	2270.08	244.435	1468.46	357.857	569.327	219.023	2619.59	4756.5	2662.44	772.288	17468.1	9380.28	11408.2	11428.1	247.742	162.211	761.551	506.966
AREA	172551	25995.5	15591.6	1400.12	61876.6	169401	3739.49	527.08	2948.6	931.558	1354.56	693.559	11687	22390.9	11687	5613.9	29606.4	13153.9	20279.2	32656	671.838	671.838	3438.87	2030.75
Mean IOD	0.823661	0.827052	0.77866	0.492318	0.666281	0.654593	0.607056	0.463753	0.498021	0.384149	0.420305	0.315795	0.224145	0.21243	0.227812	0.137567	0.590011	0.71312	0.562555	0.349952	0.368753	0.241444	0.221454	0.249645
IOD	76634.7	20163.4	10814.2	5166.52	20226.1	36328.8	1067.21	2248.67	1042.45	420.086	428.782	636.696	1626.27	1868.4	1963.52	2588.68	33569.6	2279.06	16291.3	3715.63	350.743	265.045	377.087	577.654
AREA	92940	25225.3	15174.9	9261.71	29326.1	58747.7	1833.34	6193.14	1988.38	1041.24	927.009	1844.69	8162.48	8590.34	8162.48	19327.3	56197.7	4011.47	26821.8	14253.5	931.302	931.302	1316.69	2253.35
Mean IOD	0.824561	0.79933	0.712637	0.557836	0.689695	0.618386	0.58211	0.36309	0.524273	0.403446	0.462543	0.34515	0.199237	0.217501	0.240555	0.133939	0.597349	0.568135	0.607392	0.260682	0.376616	0.284596	0.286389	0.256353
IOD	33723.2	16610.2	1328.22	9808.14	47800	34534.4	1912.91	1408.45	3171.62	731.226	553.412	250.359	2051.1	2529.82	1862.85	4572.94	13947.3	9901.58	7865.09	16428.4	235.739	173.596	274.709	740.687
AREA	42765	21593.5	1694.84	16716	84526.5	58837.5	3075.37	3939.06	6805.12	1894.34	1094.26	809.908	9150.77	11363	9150.77	31942.6	22112.1	15428.5	12618.9	52737.2	619.734	619.734	1127.07	3485.11
Mean IOD	0.78857	0.76922	0.783685	0.58675	0.565503	0.586946	0.622011	0.35756	0.466064	0.386006	0.505739	0.30912	0.224145	0.222636	0.203573	0.143161	0.630755	0.641774	0.62328	0.311515	0.380387	0.280114	0.243737	0.212529
IOD	4505.64	1349.75	3431.09	2552	7081.34	3216.81	3054.31	9948.5	3739.14	5704.22	1552.52	1917.04	955.131	1057.94	2828.75	1100.09	16848.9	2951.43	9829.6	1757.71	1859.78	6946.29	2886.06	3260.19
AREA	5363	1600	4320	5082	11071	5099.5	5241	22346	7156	14576	3358	6080	3873.83	4586.33	11425	7953	24789	5143.5	16825	6676	5475	26661	11014	12020
Mean IOD	0.840134	0.843593	0.794233	0.502165	0.63963	0.63081	0.582773	0.445203	0.522518	0.391343	0.462335	0.315303	0.24656	0.230673	0.247593	0.138324	0.679693	0.573817	0.584226	0.263289	0.339685	0.260541	0.262035	0.27123
IOD	4067.82	1266.67	4243.73	3121.72	2418.89	6900.9	4604.94	4172.43	4339.36	2292.12	3781.59	1272.69	2250.56	2505.67	1955.77	1217.88	13277	5450.7	5570.62	5448.84	2435.3	4008.92	2712.4	2468.15
AREA	5034	1617	6076.5	5710.33	3308.67	10586	7463	10841	8220	5629	7636	3802	10269	10606	8231	8438	20138	7915	8616	14079	6352	16662	10879	11502
Mean IOD	0.80807	0.783343	0.698384	0.546679	0.731077	0.651889	0.617036	0.384875	0.527902	0.407198	0.495232	0.334743	0.21916	0.236251	0.23761	0.144333	0.659302	0.688654	0.646543	0.387019	0.383391	0.240603	0.249325	0.214584
IOD	3108.93	2262.14	1513.37	1004.62	7651.94	3783.85	13752.3	1882.72	1990.62	3121.87	1575.14	1820.88	1872.87	918.815	2805.81	2303.08	7917.17	10993.5	5745.53	3294.92	3197.3	2542.42	2840.25	2348.15
AREA	4194	3148	2362.2	2003.25	12646	6065.5	20663	4921	3582	7300	3321	4977	7596	4178.33	12700	15006	12133.5	19257	9157	9060	9152	9555	10373	8591
Mean IOD	0.74128	0.718598	0.64066	0.501495	0.605088	0.623832	0.665551	0.382589	0.555729	0.427653	0.474296	0.365859	0.24656	0.2199	0.22093	0.153477	0.652505	0.570882	0.627447	0.363677	0.349356	0.266083	0.273812	0.273327
IOD	2017.65	3986.21	1891.11	4201.43	3471.08	2638.66	6651.65	3489.72	3155.36	4279.06	2346.5	2821.87	1794.58	2213.33	1070.02	961.421	14327.1	8728.55	12074.4	10140.3	3462.17	2944.82	6963.29	3690.9
AREA	2326	4711	2193.71	6509.5	5580	4125.2	10656	8872.5	6387	10458	4922	8612	7427	9765	4399	6587	23747	14044	19441	25153	9121	10241	23814	14259
Mean IOD	0.867435	0.846149	0.862061	0.645431	0.622057	0.639644	0.624216	0.393318	0.494028	0.409167	0.476737	0.327668	0.241629	0.22666	0.243241	0.145957	0.603322	0.621514	0.621081	0.403145	0.379582	0.287552	0.292403	0.258847
IOD	3625.62	2441.24	1086.44	2881.14	8980.46	2647.99	9689.53	6364.33	1791.18	2497.19	2233.58	2045.49	2883.99	416.63	2587.11	1046.58	4459.22	10933.1	2384.46	2161.73	1431.22	5681.41	1726.05	1676.58
AREA	4265	2944	1286	4555	12420.5	4103	15878	16720	3666	6171	5036	6312	12776	1718.5	11589	7597	6834	16350	3887.5	5528	3943	21327	8191	6849
Mean IOD	0.850086	0.829226	0.84482	0.632522	0.723035	0.645379	0.610249	0.380642	0.488593	0.404666	0.443522	0.324063	0.225735	0.242438	0.223239	0.137763	0.652505	0.66869	0.613366	0.391051	0.362978	0.266395	0.210725	0.244792
IOD	2864.76	1486.94	1926.94	2140.35	4246.03	4894.91	7943.27	1690.86	2534.03	1373.05	373.453	411.784	2310.75	327.476	2607.25	2596.43	4021.04	3185.71	1692.86	2455.83	2367.95	3419.71	5239.5	4282.18
AREA	3707	1972.5	2509	3722.25	6948.5	7777	11818	4376.25	5492	3593	745.889	1345.57	9099	1451.6	11503	17677	6558	4626	2725.67	6345.5	6734	14017	23100	16988
Mean IOD	0.772799	0.753835	0.768011	0.575015	0.611072	0.629408	0.672134	0.386373	0.461403	0.382146	0.500681	0.306029	0.253957	0.225597	0.226658	0.146882	0.613151	0.688654	0.621081	0.387019	0.351641	0.243969	0.226818	0.252071
Mean	0.812955	0.796705	0.764794	0.560024	0.650382	0.63121	0.620348	0.395267	0.504281	0.39953	0.471266	0.327081	0.231236	0.22601	0.230135	0.142378	0.630955	0.637249	0.611886	0.346372	0.365821	0.263477	0.251855	0.248153
SD	0.0398483	0.0440188	0.0705611	0.055935	0.0562447	0.0207	0.0314374	0.0357186	0.030876	0.014887	0.0278157	0.0191386	0.0173005	0.00937169	0.0136763	0.00605005	0.0316111	0.0564612	0.0249079	0.0551098	0.0158064	0.0184242	0.0290207	0.0217161
Mean±SD	0.81±0.04	0.80±0.04	0.76±0.07	0.56±0.06	0.65±0.06	0.63±0.02	0.62±0.03	0.40±0.04	0.50±0.03	0.40±0.01	0.47±0.03	0.33±0.02	0.23±0.02	0.23±0.01	0.23±0.01	0.14±0.01	0.63±0.03	0.64±0.06	0.61±0.02	0.35±0.06	0.37±0.02	0.26±0.02	0.25±0.03	0.25±0.02
			1286
