# Supplementary material for: The effects of the heavy metals cadmium and lead on six metabolic and immune-related enzymes in the loach (Misgurnus anguillicaudatus)
Source: PeerJ. 2026 Jan 7;14:e20547. doi: 10.7717/peerj.20547 (PMC12790279; doi:10.7717/peerj.20547)
Supplement: Supplemental Information 3 — ACP, acid phosphatase; ALP, alkaline phosphatase; ATPase, adenosine triphosphatase; MOD, mean optical density; NSE, non-specific esterase; POX, peroxidase; SD, standard deviation; SDH, succinate dehydrogenase. Data expressed as mean ± SD, n = 9. [file peerj-14-20547-s003.xlsx]

## Sheet: Measurement MOD of Pb 
Measurement of the mean optical density of POX enzymes in the visceral organs of Misgurnus anguillicaudatus exposed to Pb（Figure 4 data）
POX	Heart	Low(47.5 mg/L)	Medium(95 mg/L)	High(190 mg/L)	Hepatopancreas	Low(47.5 mg/L)	Medium(95 mg/L)	High(190 mg/L)	Gill	Low(47.5 mg/L)	Medium(95 mg/L)	High(190 mg/L)	Kidney	Low(47.5 mg/L)	Medium(95 mg/L)	High(190 mg/L)	Stomach	Low(47.5 mg/L)	Medium(95 mg/L)	High(190 mg/L)	Intestine	Low(47.5 mg/L)	Medium(95 mg/L)	High(190 mg/L)
IOD	1015.97	947.919	1122.32	1172.44	1261.07	1450.52	1198.39	988.669	1885.51	594.844	547.537	815.281	5165.93	5496.86	2427.74	3990.76	531.181	1394.26	662.697	880.511	854.07	933.237	830.463	627.605
AREA	4958	6484	7138	7017	6241	8036	6728	5083	6885	6592	4051	5746	8214	8566	6258	8653	4050	7851	5007	6259	6435	8962	9096	5174
Mean IOD	0.204915	0.146194	0.157231	0.167085	0.202062	0.180503	0.17812	0.194505	0.273858	0.0902372	0.135161	0.141887	0.628917	0.641707	0.387942	0.4612	0.131156	0.17759	0.132354	0.140679	0.132723	0.104133	0.0912999	0.1213
IOD	1084.38	925.217	785.966	1215.34	1058.93	1691.9	1314.86	958.092	1563.09	662.663	607.552	610.231	5065.43	4990.13	2443.62	3031.41	530.699	1103.99	504.696	952.736	766.224	991.746	748.913	864.802
AREA	4979	6355	5155	7019	5266	8653	7227	4833	6978	6635	4595	5249	8239	8566	6015	7126	3986	7771	4450	6430	6216	9461	8368	7237
Mean IOD	0.21779	0.145589	0.152467	0.17315	0.201087	0.195527	0.181937	0.19824	0.224003	0.0998739	0.13222	0.116257	0.614811	0.58255	0.406254	0.425402	0.133141	0.142065	0.113415	0.14817	0.123266	0.104825	0.0894973	0.119497
IOD	1050.02	915.137	1161.95	1182.41	1271.5	1451.15	1227.7	814.616	1694.17	552.78	549.709	585.467	4462.54	4821.2	2049.47	3950.31	626.439	1136.96	509.489	802.155	655.029	776.057	804.596	934.258
AREA	4971	6156	7256	7006	6120	8297	6898	4113	7014	6029	4137	4979	8208	8555	6131	9146	5104	7568	3844	6015	5366	7712	9144	7918
Mean IOD	0.211228	0.148658	0.160136	0.168771	0.207761	0.174901	0.17798	0.198059	0.241541	0.0916869	0.132876	0.117587	0.543682	0.563554	0.334281	0.431917	0.122735	0.150232	0.132541	0.133359	0.12207	0.10063	0.0879917	0.117992
IOD	1575.13	1712.57	1736.25	1072.15	921.907	1117.82	1683.21	1002.44	1191.16	713.739	468.673	804.124	5962.49	5608.99	2465.63	4838.03	956.991	448.788	1092.48	740.608	480.115	772.086	668.88	905.675
AREA	6897	10032	9989	6163	4681	6276	9079	5419	5320	6641	5596	6980	10065	9603	8457	9490	5645	2690	6842	5206	4643	7084	6974	7193
Mean IOD	0.228379	0.170711	0.173817	0.173965	0.196947	0.178111	0.185396	0.184987	0.223903	0.107475	0.0837515	0.115204	0.592398	0.584087	0.291549	0.509803	0.169529	0.166836	0.159672	0.14226	0.103406	0.10899	0.0959106	0.125911
IOD	1633	1770.47	1690.49	1095.16	652.325	1224.42	1699.51	996.207	1152.51	916.388	349.714	519.656	6309.52	5850.61	3021.49	5368.51	826.354	516.841	967.564	1058.45	262.442	783.528	720.295	580.158
AREA	6763	9953	9841	6180	3365	6570	9065	5386	4557	7308	4328	5884	10070	9633	8879	9434	5436	3114	6391	6265	2527	7817	7737	4713
Mean IOD	0.241461	0.177883	0.171781	0.177211	0.193856	0.186365	0.18748	0.184962	0.25291	0.125395	0.0808027	0.0883167	0.626566	0.607351	0.340297	0.56906	0.152015	0.165973	0.151395	0.168947	0.103855	0.100234	0.0930975	0.123097
IOD	1084.38	1784.07	1794.69	1059.22	736.654	1224.86	1833.6	997.571	1452.18	1274.33	487.708	752.592	6718.86	4345.39	3014.88	4934.4	724.673	290.588	916.41	649.754	788	747.127	935.341	668.233
AREA	5137	9942	9910	6214	3864	6575	9774	5280	5313	7744	5993	6392	10079	8227	8606	9377	4782	1892	6047	5049	7672	7290	9500	5202
Mean IOD	0.211092	0.179448	0.181099	0.170456	0.190646	0.186291	0.1876	0.188934	0.273325	0.164557	0.0813796	0.11774	0.66662	0.528186	0.350323	0.526223	0.151542	0.153588	0.151548	0.12869	0.102711	0.102487	0.0984569	0.128457
IOD	2272.89	1305.89	1216.37	1016.65	1066.51	1177.63	440.116	1647.93	1445.57	789.802	451.099	354.688	7254.28	5492.52	2654.02	4464.4	869.123	883.338	737.034	1597.53	640.971	1098.24	265.441	1021.42
AREA	11209	7633	6718	6497	6113	6942	2226	9159	7115	5884	4412	2903	11166	10018	7069	9833	6625	7008	6962	11028	5659	7506	2306	7039
Mean IOD	0.202773	0.171085	0.181061	0.156479	0.174466	0.169638	0.197716	0.179925	0.203173	0.134229	0.102244	0.12218	0.649676	0.548265	0.375445	0.454022	0.131188	0.126047	0.105865	0.144861	0.113266	0.146315	0.115109	0.145109
IOD	2361.93	1645.34	1154.64	1097.79	1021.12	1273.12	673.423	1550.11	1499.63	843.05	390.113	260.052	6848.24	5138.37	3099.23	4290.54	854.382	809.774	685.726	1500.56	549.802	511.626	231.651	953.189
AREA	11210	9673	6735	6465	6063	7101	3540	8875	7286	6696	4149	2214	11340	9994	6963	9924	6007	6405	6571	10705	5318	4005	1971	6461
Mean IOD	0.210698	0.170096	0.171438	0.169805	0.168419	0.179287	0.190232	0.17466	0.205824	0.125904	0.0940258	0.117458	0.603901	0.514145	0.4451	0.43234	0.142231	0.126428	0.104356	0.140174	0.103385	0.127747	0.11753	0.14753
IOD	2094.87	1574.04	1224.64	991.889	1066.77	1376.5	535.552	1602.24	1808.08	989.089	421.143	244.539	7588.61	5450.74	2666.03	4796.06	859.61	818.924	686.879	1398.71	484.264	697.265	504.49	859.617
AREA	11206	9228	6833	6556	5930	7647	2762	9087	7120	6479	4491	2230	11589	10081	6796	9812	5672	6442	6677	9618	4385	5314	4133	5653
Mean IOD	0.186942	0.170573	0.179225	0.151295	0.179894	0.180005	0.1939	0.176322	0.253943	0.152661	0.093775	0.109659	0.654812	0.540694	0.392294	0.488796	0.151553	0.127123	0.102872	0.145427	0.110436	0.131213	0.122064	0.152064
Mean	0.212809	0.164471	0.169806	0.16758	0.190571	0.181181	0.186707	0.186733	0.239164	0.121335	0.104026	0.116254	0.620154	0.567838	0.369276	0.47764	0.142788	0.148431	0.128224	0.143619	0.112791	0.114064	0.101217	0.131217
SD	0.0155332	0.0136766	0.0107113	0.00842522	0.01348	0.00746933	0.00671894	0.00889253	0.0265832	0.0263435	0.023098	0.0137962	0.0375179	0.0404533	0.0454122	0.0494678	0.0146588	0.0193852	0.0224643	0.0112779	0.0109366	0.0167219	0.0132571	0.0132571
Mean±SD	0.21±0.02	0.16±0.01	0.17±0.01	0.17±0.01	0.19±0.01	0.18±0.01	0.19±0.01	0.19±0.01	0.24±0.03	0.12±0.03	0.10±0.02	0.12±0.01	0.62±0.04	0.57±0.04	0.37±0.05	0.48±0.05	0.14±0.01	0.15±0.02	0.13±0.02	0.14±0.01	0.11±0.01	0.11±0.02	0.10±0.01	0.13±0.01
Measurement of the mean optical density of NSE enzymes in the visceral organs of Misgurnus anguillicaudatus exposed to Pb（Figure 4 data）
NSE	Heart	Low(47.5 mg/L)	Medium(95 mg/L)	High(190 mg/L)	Hepatopancreas	Low(47.5 mg/L)	Medium(95 mg/L)	High(190 mg/L)	Gill	Low(47.5 mg/L)	Medium(95 mg/L)	High(190 mg/L)	Kidney	Low(47.5 mg/L)	Medium(95 mg/L)	High(190 mg/L)	Stomach	Low(47.5 mg/L)	Medium(95 mg/L)	High(190 mg/L)	Intestine	Low(47.5 mg/L)	Medium(95 mg/L)	High(190 mg/L)
IOD	916.431	725.232	1664.61	1513.3	1648.94	1357.71	2093.81	1581.12	1665.11	1196.33	1971.35	1008.3	851.316	927.199	538.215	1386.62	2246.88	4931.72	1532.85	2261.25	420.503	570.664	1114.75	150.746
AREA	9134	7014	16248	15624	7899	11673	15014	12214	9273	9408	15848	8520	6671	7260	4089	11110	11519	25829	9058	10816	4465	3702	8297	1445
Mean IOD	0.100332	0.103398	0.10245	0.0968574	0.208754	0.116312	0.139457	0.129451	0.179566	0.12716	0.124391	0.118345	0.127614	0.127713	0.131625	0.124808	0.195059	0.190937	0.169227	0.169065	0.0941777	0.15415	0.134356	0.104322
IOD	1007.93	646.788	1430.21	1641.21	1944.05	1798.2	2038.67	1643.17	1752.85	1293.03	1961.5	997.036	1126.43	986.894	1003.23	1445.94	2189.89	5576.83	1753.15	971.358	473.559	1379.38	989.392	353.085
AREA	9889	5309	16090	16176	8711	13436	14830	12504	10284	9730	14296	8588	8359	7600	6427	11788	11917	25780	10355	4544	4946	8832	6584	3360
Mean IOD	0.101924	0.121829	0.088888	0.101459	0.223172	0.133835	0.13747	0.131412	0.170444	0.132891	0.137206	0.116096	0.134756	0.129854	0.156097	0.122662	0.183762	0.216324	0.169305	0.173767	0.0957458	0.15618	0.150272	0.105085
IOD	1008.35	316.83	1412.57	1655.48	1303.62	1783.46	2008.76	1948.59	1108.65	1301.4	1750.5	1438.61	1092.88	604.005	1012.76	1601.16	1884.11	4709.95	1814.63	1078.17	518.832	1214.64	661.629	410.279
AREA	9728	3148	15850	16692	6419	12882	14707	13652	7786	9784	13362	10905	8365	5681	7419	12340	10135	25670	10248	6059	5274	8201	5486	3698
Mean IOD	0.103655	0.100645	0.0891209	0.099178	0.203087	0.138446	0.136585	0.142733	0.14239	0.133013	0.131006	0.131922	0.13065	0.10632	0.136509	0.129754	0.185901	0.183481	0.177072	0.137946	0.0983755	0.148108	0.120603	0.110946
IOD	988.381	1180.51	1612.26	2197.2	5593.86	1683.08	1570.67	1543.16	1574.18	963.381	2022.28	1208.31	321.088	678.258	690.212	1731.23	2363.5	3166.71	2250.34	3162.59	409.332	1546.5	608.555	1022.92
AREA	10404	13470	16665	17774	24077	12774	11301	10749	12191	6178	14915	10003	3101	5405	5277	12247	9895	16232	9442	13032	3733	8864	5148	10230
Mean IOD	0.0950001	0.0876403	0.0967454	0.123619	0.232332	0.131758	0.138985	0.143563	0.129126	0.155937	0.135587	0.120795	0.103543	0.125487	0.130796	0.141359	0.238858	0.19509	0.238333	0.202679	0.109652	0.17447	0.118212	0.0999918
IOD	1070.95	1280.11	1610.56	1839.6	5658.73	1949.02	1645.25	1649.59	1596.31	964.847	1919.04	1412.01	864.664	745.886	661.526	1729.63	2346.22	3135.22	2799.24	2958.45	677.976	1882.59	742.691	1069.36
AREA	10449	13869	16244	18085	23969	13902	11464	10746	13105	6211	14344	10998	6622	5952	5110	12449	10232	16962	11889	11735	5835	11077	6045	10644
Mean IOD	0.102493	0.0923002	0.0991482	0.10172	0.236086	0.140197	0.143514	0.153508	0.12181	0.155345	0.133787	0.128388	0.130574	0.125317	0.129457	0.138937	0.229302	0.184838	0.235448	0.212105	0.116191	0.169955	0.12286	0.100466
IOD	907.7	1199.76	1560.91	1771.55	5775.41	1399.36	1463.08	1770.64	1753.01	1172.59	2100.77	533.564	591.545	870.003	329.899	1192.42	2279.92	2951.6	1906	3286.5	751.713	1798.46	812.986	1162.88
AREA	10396	13276	16355	18041	25092	10882	10592	11731	13095	7336	15107	5591	4528	6703	3047	11063	9580	17049	8962	13355	6285	11447	6226	10790
Mean IOD	0.0873124	0.0903709	0.0954392	0.0981957	0.230169	0.128594	0.13813	0.150937	0.133869	0.15984	0.139059	0.0954326	0.130641	0.129793	0.10827	0.107784	0.237988	0.173124	0.212675	0.206087	0.119604	0.157112	0.130579	0.107774
IOD	436.98	1290.69	1802	795.786	2711.23	1596.17	1319.09	1383.47	1370.3	921.81	1453.5	1102.19	1124.82	1026.33	565.501	1602.17	2530.47	2363.21	1440.01	2215.12	504.604	984.173	750.461	1363.38
AREA	5373	13032	17781	9281	14456	11085	11772	11303	9725	6823	8787	9153	7085	6886	4418	12186	12503	11970	8020	10241	4683	7170	4371	10107
Mean IOD	0.0813288	0.09904	0.101344	0.0857435	0.18755	0.143994	0.112053	0.122398	0.140904	0.135103	0.165415	0.120418	0.158761	0.149045	0.127999	0.131476	0.202389	0.197427	0.179552	0.1763	0.107752	0.137263	0.171691	0.134894
IOD	987.2	1143.87	2182.99	713.787	2529.99	2228.61	1507.14	1397.62	1555.5	986.201	1054.3	1149.32	448.776	903.605	529.195	1393.29	2465.41	2322.89	1277.67	2634.31	224.725	932.541	666.93	1310.71
AREA	8065	12941	17653	9281	14479	13801	13037	11441	10423	7185	7416	9101	3507	7044	4019	11822	12183	12151	6598	11913	1947	7391	4316	10076
Mean IOD	0.122405	0.0883913	0.123661	0.0769084	0.174735	0.161482	0.115605	0.122159	0.149237	0.137258	0.142166	0.126285	0.127966	0.12828	0.131673	0.117856	0.202365	0.191169	0.193645	0.181129	0.115421	0.126173	0.154525	0.130082
IOD	768.129	1119.13	1739.65	737.984	2845.34	1993.12	1344.37	1235.12	1552.77	1018.65	667.394	1293.58	594.346	936.669	591.37	1351.98	2289.46	2289.64	1306.99	1002.4	376.814	1130.79	573.187	1092.24
AREA	7696	12840	17753	9340	14590	12827	12007	10530	10588	7242	4352	9244	4695	7345	4599	10944	11877	11955	7668	5346	3158	8220	4259	9880
Mean IOD	0.0998089	0.0871596	0.0979921	0.0790133	0.19502	0.155384	0.111965	0.117295	0.146654	0.140659	0.153353	0.139937	0.126591	0.127525	0.128587	0.123536	0.192764	0.191521	0.170447	0.147504	0.11932	0.137566	0.134583	0.110551
Mean	0.0993622	0.0967526	0.099421	0.0958549	0.210101	0.138889	0.130418	0.134828	0.146	0.141912	0.140219	0.121958	0.130122	0.127704	0.131224	0.126464	0.207599	0.191546	0.193967	0.178509	0.108471	0.15122	0.13752	0.111568
SD	0.011491	0.011174	0.0102629	0.0141378	0.0217392	0.013705	0.0130912	0.0132768	0.0186788	0.0119705	0.0123481	0.0124366	0.0140189	0.0107975	0.0122192	0.0103814	0.0219161	0.0117846	0.0280754	0.0255038	0.0101219	0.0157232	0.017889	0.0125225
Mean±SD	0.10±0.01	0.10±0.01	0.10±0.01	0.10±0.01	0.21±0.02	0.14±0.01	0.13±0.01	0.13±0.01	0.15±0.02	0.14±0.01	0.14±0.01	0.12±0.01	0.13±0.01	0.13±0.01	0.13±0.01	0.13±0.01	0.21±0.02	0.19±0.01	0.19±0.03	0.18±0.03	0.11±0.01	0.15±0.02	0.14±0.02	0.11±0.01
Measurement of the mean optical density of SDH enzymes in the visceral organs of Misgurnus anguillicaudatus exposed to Pb（Figure 4 data）
SDH	Heart	Low(47.5 mg/L)	Medium(95 mg/L)	High(190 mg/L)	Hepatopancreas	Low(47.5 mg/L)	Medium(95 mg/L)	High(190 mg/L)	Gill	Low(47.5 mg/L)	Medium(95 mg/L)	High(190 mg/L)	Kidney	Low(47.5 mg/L)	Medium(95 mg/L)	High(190 mg/L)	Stomach	Low(47.5 mg/L)	Medium(95 mg/L)	High(190 mg/L)	Intestine	Low(47.5 mg/L)	Medium(95 mg/L)	High(190 mg/L)
IOD	3080.8	2536.73	2753.49	1764.75	2508.9	1534.96	775.506	629.176	ND				ND				1668.86	1144.92	563.777	1155.02	25.8107	32.2112	19.0636	17.2292
AREA	9232	7196	9035	5653	13628	17372	8787	10639									12137	9833	9247	17589	228.768	337.857	206.667	244.111
Mean IOD	0.333708	0.352519	0.304758	0.31218	0.184099	0.0883582	0.088256	0.0591387									0.137502	0.116437	0.0609686	0.0656672	0.112825	0.0953399	0.0922431	0.0705791
IOD	3356.65	3274.57	3161.08	1726.67	2744.33	1405.5	639.383	624.595									1380.8	1402.64	626.685	1282.62	7.55483	37.2902	87.6903	11.9657
AREA	9219	8128	9766	5602	14819	17163	7865	10853									11344	10284	9985	15307	121.879	393.333	1143.8	239.1
Mean IOD	0.364102	0.402875	0.323682	0.308223	0.18519	0.0818911	0.0812948	0.0575504									0.12172	0.136391	0.0627627	0.0837932	0.0619863	0.0948057	0.0766657	0.0500447
IOD	3104.84	2815.84	3354.59	2119.7	2189.6	1387.61	499.056	537.529									1436.49	713.975	570.375	763.962	17.4146	11.7211	469.892	343.098
AREA	9133	7944	10454	6649	13258	17370	6599	9538									12172	10041	9465	12536	238.413	181.286	3170	3189
Mean IOD	0.339958	0.354461	0.32089	0.318799	0.165153	0.0798856	0.075626	0.0563566									0.118016	0.0711059	0.0602615	0.0609414	0.073044	0.0646552	0.148231	0.107588
IOD	4740.93	2912.04	3369.92	2888.2	1633.03	543.086	670.391	1020.66									1671.71	763.802	936.65	499.309	176.415	163.59	160.176	54.3561
AREA	12775	9453	10709	9312	12649	7055	7627	14021									14865	15087	9535	10578	1767	1615	1775.33	495.2
Mean IOD	0.37111	0.308054	0.314681	0.310159	0.129104	0.0769788	0.087897	0.0727948									0.11246	0.0506265	0.0982328	0.0472026	0.0998385	0.101294	0.090223	0.109766
IOD	5259.79	2844.26	3598.85	3140.26	1661.72	701.561	726.567	987.343									1432.78	892.689	899.333	433.537	176.051	182.866	8.71533	60.9628
AREA	12771	9423	10913	9320	12501	8406	7670	13880									14295	15643	10455	9947	1796.67	1100	94.8333	534.6
Mean IOD	0.411855	0.301842	0.329777	0.336938	0.132927	0.0834596	0.0947285	0.0711342									0.10023	0.0570664	0.0860194	0.0435847	0.0979878	0.166242	0.0919016	0.114035
IOD	4910.56	3142.49	3328.77	2602.82	2145.49	908.449	883.574	719.415									1111.33	669.21	862.453	580.19	192.051	3.31128	38.328	464.753
AREA	12717	9294	10916	9208	13529	9397	9188	11486									12776	15700	9484	10944	1451	46.1471	242.588	5134
Mean IOD	0.386141	0.33812	0.304944	0.282669	0.158585	0.0966744	0.0961661	0.0626341									0.0869856	0.0426248	0.0909377	0.0530145	0.132358	0.0717549	0.157996	0.0905245
IOD	3653.78	3023.58	2743.19	2741.83	2390.01	944.103	899.768	497.771									1655.32	690.945	752.149	1327.09	511.942	302.837	5514.16	1470.11
AREA	9572	9236	7918	10960	17766	14698	13507	5794									15575	10630	11605	14845	7169	1907	36457	11543
Mean IOD	0.381715	0.327369	0.34645	0.250167	0.134527	0.0642334	0.0666149	0.0859115									0.106281	0.0649995	0.0648125	0.0893964	0.0714105	0.158803	0.151251	0.127359
IOD	3901.08	2418.66	2601.46	3345.72	2920.16	951.688	878.282	466.806									1625.48	583.593	966.204	1299.64	44.3605	742.616	1463.75	869.751
AREA	9633	7962	7895	11101	18187	15523	13352	5593									15600	9529	12893	14537	443.428	5969.67	18699	13716
Mean IOD	0.404971	0.303776	0.329508	0.30139	0.160563	0.0613083	0.0657791	0.0834626									0.104198	0.0612439	0.0749402	0.0894024	0.10004	0.124398	0.0782796	0.0634114
IOD	3820.48	3065.34	2411.27	2827.37	1185.99	1279.15	1042.41	368.327									1433.72	508.322	662.077	1522.99	74.0154	364.113	1252.26	365.022
AREA	9820	9399	7081	10975	10463	16851	13858	4855									15753	8588	9722	13585	499.2	4582.5	14006	4609.5
Mean IOD	0.389051	0.326135	0.340527	0.257619	0.113351	0.0759093	0.0752207	0.0758656									0.0910126	0.0591899	0.0681009	0.112108	0.148268	0.0794573	0.0894085	0.079189
Mean	0.375846	0.335017	0.323913	0.297572	0.1515	0.0787443	0.081287	0.0694276									0.108712	0.0732983	0.0741151	0.0716789	0.0997508	0.106306	0.108467	0.0902774
SD	0.0266541	0.032093	0.0144515	0.028648	0.0252648	0.0110289	0.0112857	0.0111149									0.015741	0.0315793	0.0142452	0.0231773	0.0285785	0.0364051	0.0335802	0.0261496
Mean±SD	0.38±0.03	0.34±0.03	0.32±0.01	0.30±0.03	0.15±0.03	0.08±0.01	0.08±0.01	0.07±0.01									0.11±0.02	0.07±0.03	0.07±0.01	0.07±0.02	0.10±0.03	0.11±0.04	0.11±0.03	0.09±0.03
Measurement of the mean optical density of ACP enzymes in the visceral organs of Misgurnus anguillicaudatus exposed to Pb（Figure 4 data）
ACP	Heart	Low(47.5 mg/L)	Medium(95 mg/L)	High(190 mg/L)	Hepatopancreas	Low(47.5 mg/L)	Medium(95 mg/L)	High(190 mg/L)	Gill	Low(47.5 mg/L)	Medium(95 mg/L)	High(190 mg/L)	Kidney	Low(47.5 mg/L)	Medium(95 mg/L)	High(190 mg/L)	Stomach	Low(47.5 mg/L)	Medium(95 mg/L)	High(190 mg/L)	Intestine	Low(47.5 mg/L)	Medium(95 mg/L)	High(190 mg/L)
IOD	1729.94	1720.48	1029.71	1634.33	4700.72	1280.12	3859.89	1274.46	9341.55	7901.69	4637.81	5302.45	4217.12	4744.07	4954.06	4865.96	8835.56	6897.07	8264.21	16565	6191.61	6847.68	5282.44	4741.57
AREA	14276	16640	13679	14716	12545	9971	18616	17656	19455	17553	21270	14296	16555	13654	17786	21944	14358	13578	15467	26892	12255	12703	11350	15912
Mean IOD	0.121178	0.103394	0.0752768	0.111058	0.374709	0.128384	0.207343	0.0721828	0.480162	0.450162	0.218045	0.370904	0.254734	0.347449	0.278537	0.221744	0.615376	0.507959	0.534312	0.615982	0.505232	0.53906	0.465413	0.297987
IOD	1890.65	1383.8	1177.57	1428.1	4429.54	1350.44	2631.7	1146.58	7242.38	5749.59	5468.46	3715.43	3999.05	4397.53	4845.62	5771.03	9216.06	9166.5	7817.67	15207.8	8613.89	7956.64	3278.05	4244.05
AREA	10695	17062	13731	15539	12360	10299	17050	14947	19736	17063	21884	12335	16603	12729	18375	23290	15260	14671	13009	26123	14974	13917	7593	15998
Mean IOD	0.176778	0.081104	0.0857596	0.0919041	0.358377	0.131123	0.154352	0.0767097	0.366963	0.336963	0.249884	0.30121	0.240863	0.345473	0.263707	0.24779	0.603936	0.624804	0.600943	0.582161	0.575257	0.571721	0.43172	0.265286
IOD	1634.33	1944.39	1228.28	2265.48	5578.31	1766.24	2393.03	1369.89	7752.33	5689.98	5618.59	5987.87	3555.77	4450.93	5240.18	5590.72	8555.38	8572.98	7652.31	15580.9	8012.93	6925.49	7429.01	3552.26
AREA	15657	17051	13216	15227	13074	11276	16549	16211	19811	15748	20266	14966	16476	13707	18583	22877	14016	14420	14855	24216	14211	13222	13905	15719
Mean IOD	0.104383	0.114034	0.0929389	0.148781	0.426672	0.156637	0.144603	0.0845035	0.391314	0.361314	0.277242	0.400098	0.215815	0.324719	0.281988	0.244382	0.610401	0.59452	0.515134	0.643412	0.563854	0.523786	0.534269	0.225985
IOD	2003.6	933.313	1110.82	586.847	6028.79	2213.07	1851.7	2221.69	5706.42	3986.68	3181.98	3834.55	5063.28	4976.45	4378.98	4869.23	7995.39	9182.98	8380.37	8987.09	8083.53	6118.99	7263.55	3993.95
AREA	15910	12279	11264	5277	18229	13423	16206	13967	14589	11039	15017	12489	14455	16571	13019	16521	15742	16185	14293	16382	14371	13308	13695	20623
Mean IOD	0.125933	0.0760089	0.0986166	0.111208	0.330725	0.164871	0.11426	0.159067	0.391145	0.361145	0.211892	0.307034	0.350279	0.300311	0.336353	0.29473	0.507902	0.567376	0.586327	0.548595	0.562489	0.459798	0.53038	0.193665
IOD	2058.52	1019.49	1843.33	1492.25	4804.56	2267.84	1782.33	1962.46	5522.43	3769.74	3101.28	3777.78	4662.04	5891.12	3580.63	6784.93	9457.06	10287.4	11865.2	8939.98	6791.93	8552.42	6738.51	4472.85
AREA	16022	9592	10864	9527	15626	12154	16045	14351	13992	10337	14989	12252	13844	19764	11498	18805	16657	20028	18461	16988	12831	18300	14324	23531
Mean IOD	0.128481	0.106286	0.169673	0.156634	0.307472	0.186592	0.111083	0.136748	0.394685	0.364685	0.206904	0.30834	0.336755	0.298073	0.311414	0.360804	0.567753	0.513653	0.642716	0.526253	0.529337	0.467345	0.470435	0.190083
IOD	2563.38	1394.24	1436.01	467.259	4763.97	2417.24	1645.48	2244.52	7274.48	5536.64	3890.88	3359.7	3892.2	6713.92	7697.66	5301.58	7893.56	9343.22	10707.1	8225.47	7997.36	10813.3	7587.37	5285.73
AREA	16279	7665	10300	5400	15872	12986	16008	15224	14442	11688	13922	11803	12116	19686	20566	18110	15556	18720	17639	15709	14179	19588	14833	23388
Mean IOD	0.157465	0.181897	0.139418	0.0865295	0.300149	0.186142	0.102791	0.147433	0.503703	0.473703	0.279477	0.284648	0.321245	0.34105	0.374291	0.292743	0.507428	0.499104	0.607015	0.523615	0.564028	0.552038	0.51152	0.226002
IOD	3931.74	2002.99	2039.23	661.446	4726.52	2816.41	1712.17	1332.96	4738.96	3734.99	3717.43	4932.68	4696.85	3730.12	3450.37	920.999	9529.49	10522.4	12752.5	9088.34	8096.51	8636.94	12906.6	3087.22
AREA	19478	17504	15146	11005	13049	19825	13486	11714	12980	11146	13994	15673	15516	13960	14123	3835	18624	17774	20379	15129	17722	19322	24747	11873
Mean IOD	0.201855	0.11443	0.134638	0.0601041	0.362213	0.142064	0.126959	0.113792	0.365097	0.335097	0.265644	0.314725	0.30271	0.267201	0.244309	0.240156	0.511678	0.592011	0.625769	0.600723	0.456862	0.447	0.521543	0.26002
IOD	2231.68	3212.29	1245.19	1142.46	5007.79	3840.15	1447.08	1206.06	5367.36	3695.16	4891.51	5968.77	4495.5	3982.91	3828.05	2139.06	9430.9	10213.5	9846.74	10735.2	9138.43	10850	8555.64	3541.45
AREA	18657	17518	16144	11048	12771	23568	12369	11418	13689	10205	15253	17718	15638	14459	15627	8636	18700	18246	17354	16912	20082	22983	20977	14223
Mean IOD	0.119616	0.183371	0.07713	0.103408	0.392122	0.162939	0.116992	0.105628	0.392093	0.362093	0.320692	0.336876	0.287473	0.275463	0.244964	0.247692	0.504326	0.559765	0.567404	0.634768	0.455056	0.472086	0.407858	0.248995
IOD	2622.65	2068.1	1073.49	626.45	5234.4	3200.8	2066.97	1094.54	5627.8	4204.2	4632.81	4990.43	4413.56	3490.3	4876.82	990.268	9054.18	9965.9	13308.9	11238.5	8256.52	7375.41	10108.5	4754.77
AREA	19248	17024	15904	11074	13609	19651	14169	11063	13232	10635	14960	15971	15535	12461	18367	4029	17289	17137	20383	18027	16715	15848	22626	14944
Mean IOD	0.136256	0.121481	0.067498	0.0565695	0.384627	0.162882	0.14588	0.0989367	0.425317	0.395317	0.30968	0.312468	0.284104	0.280098	0.265521	0.245785	0.523696	0.581543	0.652942	0.623427	0.493959	0.465384	0.446766	0.318173
Mean	0.141327	0.120223	0.10455	0.102911	0.359674	0.157959	0.136029	0.110555	0.412275	0.382275	0.25994	0.326256	0.28822	0.308871	0.289009	0.266203	0.550277	0.560082	0.592507	0.588771	0.522897	0.499802	0.479989	0.247355
SD	0.0313265	0.0384503	0.0351191	0.0344513	0.0410864	0.0210955	0.0320888	0.0313564	0.0487587	0.0487587	0.0416177	0.0369645	0.0449048	0.031593	0.0437398	0.0428623	0.0487044	0.0440158	0.0469081	0.0460941	0.0472128	0.046653	0.0462963	0.043501
Mean±SD	0.14±0.03	0.12±0.04	0.10±0.04	0.10±0.03	0.36±0.04	0.16±0.02	0.14±0.03	0.11±0.03	0.41±0.05	0.38±0.05	0.26±0.04	0.33±0.04	0.29±0.04	0.31±0.03	0.29±0.04	0.27±0.04	0.55±0.05	0.56±0.04	0.59±0.05	0.59±0.05	0.52±0.05	0.50±0.05	0.48±0.05	0.25±0.04
Measurement of the mean optical density of ALP enzymes in the visceral organs of Misgurnus anguillicaudatus exposed to Pb（Figure 4 data）
ALP	Heart	Low(47.5 mg/L)	Medium(95 mg/L)	High(190 mg/L)	Hepatopancreas	Low(47.5 mg/L)	Medium(95 mg/L)	High(190 mg/L)	Gill	Low(47.5 mg/L)	Medium(95 mg/L)	High(190 mg/L)	Kidney	Low(47.5 mg/L)	Medium(95 mg/L)	High(190 mg/L)	Stomach	Low(47.5 mg/L)	Medium(95 mg/L)	High(190 mg/L)	Intestine	Low(47.5 mg/L)	Medium(95 mg/L)	High(190 mg/L)
IOD	ND				2504.19	1546.62	1491.28	2170.07	1952.82	1488.6	1688.87	1935.11	ND				7092.22	7295.37	7786.29	3901.35	2319.37	2305.61	2948.98	1306.4
AREA					15294	10305	10649	18608	16162	8317	11740	14610					17204	15857	16647	14821	14639	13947	19619	8247
Mean IOD					0.163737	0.150085	0.14004	0.11662	0.120828	0.178982	0.143856	0.124451					0.412243	0.460073	0.467729	0.263231	0.158438	0.165312	0.150312	0.158409
IOD					2683.68	1525.2	1171.17	2579.77	1937.91	1283.73	801.312	1889.33					8882.61	6453.49	6490.86	3698.72	2427.93	2170.41	3313.39	1800.47
AREA					15341	8970	9617	18590	15305	7353	5953	14519					19491	16140	16336	13294	15233	12204	20347	13096
Mean IOD					0.174935	0.170034	0.121781	0.138772	0.126619	0.174586	0.134606	0.122128					0.455729	0.399844	0.397335	0.278225	0.159386	0.177844	0.162844	0.137483
IOD					2048.2	822.617	1494.8	2655.91	2103.69	1830.76	1353.95	1987.88					5864.52	4672.19	4964.38	3751.97	3116.19	1321.12	3241.7	1285.1
AREA					13385	5705	10753	19288	16218	10104	9818	14602					14426	13104	13106	14294	16998	7154	19106	8198
Mean IOD					0.153022	0.144192	0.139012	0.137697	0.129713	0.181191	0.137905	0.128137					0.406525	0.356547	0.378787	0.262486	0.183327	0.184669	0.169669	0.156758
IOD					3633.38	1799.62	1587.66	1238.22	2490.81	1174.95	929.064	1111.47					5961.66	6166.61	5596.39	2997.95	1984.29	1334.89	2689.42	3072.1
AREA					25239	12232	10883	8164	15382	9030	6684	8464					14617	17644	15624	14798	11254	8072	17885	20667
Mean IOD					0.143959	0.147124	0.145884	0.151669	0.16193	0.130117	0.138998	0.123318					0.407858	0.349502	0.358192	0.202592	0.176318	0.165373	0.150373	0.148648
IOD					3728.29	1445.28	1734.29	1618.21	2181.95	834.917	981.681	1212.01					6695.44	6776.94	5929.27	2472.21	1818.1	1029.18	2984.86	3257.99
AREA					25485	9876	11939	9668	14387	6486	7017	8508					14969	17990	15655	15002	10258	5305	16675	21012
Mean IOD					0.146294	0.146342	0.145262	0.167378	0.151661	0.128726	0.1399	0.134456					0.447287	0.376706	0.378746	0.164792	0.177238	0.194002	0.179002	0.155054
IOD					3363.48	1940.71	1778.76	734.294	2281.08	1203.37	1143.47	914.791					5354.65	6285.75	5508.74	2401.02	1741.19	1220.35	2498.6	2758.14
AREA					24376	13077	12140	4858	15748	9439	7519	8489					12644	18826	15102	14777	9939	7170	16099	17570
Mean IOD					0.137983	0.148406	0.146521	0.151152	0.144849	0.127489	0.152077	0.099762					0.423493	0.333886	0.364769	0.162484	0.175188	0.170202	0.155202	0.15698
IOD					1517.86	1102.97	1437.83	1221.37	1430.61	1662.28	1634.37	1807.15					6105.95	7489.35	6594.74	4218.55	1438.98	2827.44	282.265	2116.85
AREA					8228	7562	8283	7967	10430	14729	11794	13684					17813	20837	17874	17967	9215	16013	1747	11937
Mean IOD					0.184475	0.145857	0.173588	0.153304	0.137163	0.112858	0.138576	0.124063					0.342781	0.359425	0.368957	0.234794	0.156157	0.176571	0.161571	0.177336
IOD					1241.76	1656.81	1498.23	990.399	1409.47	2050.27	868.271	2166.41					5929.05	7878.5	8004.9	4953.76	2094.4	1510.96	743.019	1448.33
AREA					6746	11373	9882	6538	9971	15973	6730	14597					17194	21340	18146	18188	13673	7556	4017	9155
Mean IOD					0.184074	0.145679	0.151612	0.151484	0.141357	0.128359	0.129015	0.140415					0.344833	0.369189	0.441138	0.272364	0.153178	0.199969	0.184969	0.158201
IOD					2002.88	1316.74	1469.36	684.062	1036.75	2022.41	1050.21	1993.41					6245.96	7612.4	5999.2	4796.05	2301.33	2992.81	423.966	1723.08
AREA					10658	10650	9887	4639	7468	15984	8824	15039					17961	20848	18111	18182	15025	18723	2927	10421
Mean IOD					0.187923	0.123637	0.148616	0.147459	0.138826	0.126527	0.119017	0.124549					0.347751	0.365138	0.331246	0.26378	0.153167	0.159847	0.144847	0.165347
Mean					0.164045	0.146817	0.145813	0.14617	0.139216	0.143204	0.137106	0.124587					0.398722	0.374479	0.387433	0.233861	0.165822	0.177088	0.162088	0.157135
SD					0.0194508	0.0117203	0.0135595	0.014077	0.0127406	0.0268216	0.00923857	0.0110948					0.0435612	0.0369284	0.0424956	0.0459234	0.0119583	0.0136405	0.0136405	0.0108455
Mean±SD					0.16±0.02	0.15±0.01	0.15±0.01	0.15±0.01	0.14±0.01	0.14±0.03	0.14±0.01	0.12±0.01					0.40±0.04	0.37±0.04	0.39±0.04	0.23±0.05	0.17±0.01	0.18±0.01	0.16±0.01	0.16±0.01
Measurement of the mean optical density of ATP enzymes in the visceral organs of Misgurnus anguillicaudatus exposed to Pb（Figure 4 data）
ATP	Heart	Low(47.5 mg/L)	Medium(95 mg/L)	High(190 mg/L)	Hepatopancreas	Low(47.5 mg/L)	Medium(95 mg/L)	High(190 mg/L)	Gill	Low(47.5 mg/L)	Medium(95 mg/L)	High(190 mg/L)	Kidney	Low(47.5 mg/L)	Medium(95 mg/L)	High(190 mg/L)	Stomach	Low(47.5 mg/L)	Medium(95 mg/L)	High(190 mg/L)	Intestine	Low(47.5 mg/L)	Medium(95 mg/L)	High(190 mg/L)
IOD	12281.9	12545.4	4616.19	11157.2	17473	9140.33	10865.3	12078.9	11348.3	6497.67	6513.06	8053.98	5400.79	5141.12	5678.23	2557.95	13498.9	12231.3	16404.4	10804.2	4980.67	5996.06	3981.97	1256.4
AREA	13782	15764	11717	20659	25396	19028	25144	31930	21835	13773	16652	32855	23526	19999	25972	10676	21368	20163	27951	18534	16020	18087	19418	6624
Mean IOD	0.891157	0.895823	0.393973	0.540063	0.688024	0.480362	0.432124	0.378293	0.51973	0.471769	0.391128	0.245137	0.229567	0.257069	0.218629	0.239598	0.631733	0.606621	0.586899	0.582942	0.310903	0.331512	0.205066	0.189674
IOD	12067.9	11746.8	3871.77	12962	19059.5	9838.53	10640.2	13495	10999.2	15476.5	6683.41	11145.2	5210.67	4045.91	5147.83	3764.46	13116	11127.1	18156.5	11010.1	4515.08	5979.19	4463.33	1367.06
AREA	13144	15450	10924	22161	27137	19413	25155	29409	21788	30031	16491	34647	23209	17311	24416	15128	19437	18611	27883	18732	13300	17161	21580	8191
Mean IOD	0.918131	0.860313	0.354428	0.584899	0.702345	0.506801	0.422985	0.458871	0.504828	0.51535	0.405276	0.321678	0.224511	0.233719	0.210838	0.248841	0.674796	0.597876	0.651168	0.587768	0.339479	0.348417	0.206827	0.166898
IOD	12336.1	11779	4030.4	11384.8	18076.5	9945.27	11070.1	13265.2	10937.6	15503.1	6874.96	10929.3	5406.51	4359.02	4955.09	3494.97	10473.1	9824.13	16772	12165.7	4695.8	7204.96	4160.02	1834.29
AREA	13526	14830	10367	21075	24731	19251	25551	31613	20224	28626	15822	34322	23970	18916	24805	14627	17442	17469	24004	18582	14981	17676	18502	9039
Mean IOD	0.912029	0.894269	0.388772	0.540206	0.730924	0.516611	0.433255	0.419611	0.540824	0.541573	0.434519	0.318435	0.225553	0.230441	0.199762	0.23894	0.600452	0.562375	0.698715	0.654704	0.31345	0.407613	0.224842	0.20293
IOD	13628.3	10792.4	6886.52	8713.39	9946.53	12039.8	10591.5	7929.41	10527.1	14232.5	7800.3	5259.95	7890.73	5981.94	4798.77	4131.37	11872.9	16897.7	15289.9	15441.4	5487.67	6506.84	4315.97	2502.34
AREA	14673	14688	19138	19483	15631	26065	20843	23349	19665	29344	14989	23048	21288	19753	20803	16137	16725	26096	22450	28601	15149	22600	17221	15894
Mean IOD	0.928803	0.834777	0.359835	0.447231	0.636334	0.461916	0.508156	0.339604	0.535322	0.485022	0.520402	0.228217	0.370666	0.302837	0.230677	0.256018	0.709887	0.647522	0.681063	0.539889	0.362246	0.287913	0.250623	0.157439
IOD	11826	10221.7	7940.16	9705.15	11312.8	13035.7	11437.8	7718.28	10576.2	15872.9	6037.03	5923.02	6738.78	4483.32	5103.54	3864.38	9918.99	20320.4	14197.4	15789.8	6583.23	5417.45	4447.42	2843.96
AREA	14191	14231	19021	19433	16136	26625	20678	21053	20340	29954	15180	27831	21388	15836	20958	15355	16196	28322	25023	25617	17335	17866	14416	16569
Mean IOD	0.833344	0.818271	0.417442	0.499416	0.701092	0.489604	0.553139	0.366612	0.519973	0.52991	0.397696	0.212821	0.315073	0.283109	0.243513	0.251669	0.612434	0.717476	0.567372	0.61638	0.379765	0.303227	0.308505	0.171643
IOD	12526.6	10534.1	8966.26	10966.1	10454.3	12814.5	10167.1	8944.68	9862.54	17342.1	6454.54	9082.17	6267.7	4695.21	5598.71	5787.36	9530.35	19798.2	12992.1	15025.7	6775.15	7801.08	4012.83	3075.44
AREA	13729	14313	20062	19571	15001	26822	20452	22722	17705	31430	14029	30765	20506	16955	22517	19427	15168	30092	21857	24685	17228	20529	18600	15267
Mean IOD	0.912421	0.835983	0.446928	0.560323	0.696908	0.47776	0.497121	0.393657	0.557048	0.551771	0.460086	0.295211	0.305652	0.276922	0.248644	0.297903	0.628319	0.657922	0.594413	0.608698	0.393264	0.380003	0.215743	0.201443
IOD	13192.2	12307.8	5757.28	6314.55	18229.3	11321.7	9299.19	7594.44	19187.7	13263.1	11409.2	7698.13	3729.04	2519.83	3690.17	3845.42	10708.7	11726.8	8740.75	16332.3	10416.1	4159.36	2547.3	1941.37
AREA	13379	15274	13095	11300	24433	25251	20878	16865	37637	25499	23275	28481	14426	10010	13324	16573	16149	20204	14918	28648	28868	13721	14057	8629
Mean IOD	0.986039	0.905799	0.439655	0.55881	0.746094	0.448368	0.445406	0.450308	0.509811	0.52014	0.49019	0.27029	0.258494	0.251732	0.276957	0.232029	0.663119	0.580417	0.58592	0.570103	0.360818	0.303139	0.181212	0.224981
IOD	12280.8	12632.3	7380.29	4526.64	17164.2	12061.1	10950.2	7448.53	18797.2	13902.6	11213.5	4265.03	3951.06	4005.13	3627.22	4051.74	9587.93	14008.2	11469.7	16742	8778.9	5163.01	2894.74	2989.63
AREA	14065	14521	13662	10135	24298	25881	21860	15209	34417	25910	23938	20373	14687	15611	13184	16401	15577	22850	17713	27536	23313	16720	12887	9539
Mean IOD	0.873148	0.969933	0.540206	0.446635	0.706404	0.46602	0.500926	0.489745	0.546162	0.536573	0.468438	0.209347	0.269018	0.256558	0.275123	0.247042	0.615518	0.613049	0.647531	0.608003	0.376567	0.308793	0.224625	0.313411
IOD	12546.1	12084.3	6292.04	5409.9	14250	8616.35	10205.4	6565.92	17951.3	12301.5	9268.26	5937.69	4134.1	4397.65	3719.11	5718.41	11870.3	10832.1	11790.4	18995.4	6984.34	3966.19	2560.05	2948.24
AREA	13328	14660	13437	10258	22015	24137	21459	15499	33206	25130	23011	22321	14544	16375	14439	18686	18935	19512	17996	28258	16817	14303	13341	11778
Mean IOD	0.941336	0.924306	0.468262	0.527383	0.647288	0.356977	0.475579	0.423635	0.540605	0.489513	0.402775	0.266014	0.284248	0.268558	0.257574	0.306026	0.626898	0.555152	0.655166	0.672214	0.415314	0.277298	0.191893	0.250317
Mean	0.910712	0.882164	0.423278	0.522774	0.695046	0.467157	0.474299	0.413371	0.530478	0.515736	0.441168	0.263017	0.275865	0.262327	0.240191	0.257563	0.640351	0.615379	0.629805	0.604522	0.361312	0.327546	0.22326	0.208749
SD	0.0429799	0.0491289	0.0584937	0.049043	0.0351651	0.0465422	0.0440521	0.0482947	0.0176634	0.0278046	0.0460746	0.0426343	0.0489166	0.0232732	0.0274048	0.0262713	0.0352279	0.0516169	0.0470465	0.0408947	0.0350357	0.0436581	0.0377977	0.0489358
Mean±SD	0.91±0.04	0.88±0.05	0.42±0.06	0.52±0.05	0.70±0.04	0.47±0.05	0.47±0.04	0.41±0.05	0.53±0.02	0.52±0.03	0.44±0.05	0.26±0.04	0.28±0.05	0.26±0.02	0.24±0.03	0.26±0.03	0.64±0.04	0.62±0.05	0.63±0.05	0.60±0.04	0.36±0.04	0.33±0.04	0.22±0.04	0.21±0.05
			1286
