# Supplementary material for: The effects of the heavy metals cadmium and lead on six metabolic and immune-related enzymes in the loach (Misgurnus anguillicaudatus)
Source: PeerJ. 2026 Jan 7;14:e20547. doi: 10.7717/peerj.20547 (PMC12790279; doi:10.7717/peerj.20547)
Supplement: Supplemental Information 4 — ACP, acid phosphatase; ALP, alkaline phosphatase; ATPase, adenosine triphosphatase; MOD, mean optical density; NSE, non-specific esterase; POX, peroxidase; SD, standard deviation; SDH, succinate dehydrogenase. Data expressed as mean ± SD, n = 9; *significant difference (p < 0.05); **extremely significant difference (p < 0.01). [file peerj-14-20547-s004.xlsx]

## Sheet: ACP
	Statistical analysis of the effects of Cd on the activities of ACP enzymes in the visceral organs of Misgurnus anguillicaudatus（Figure 2 Analysis）
	Heart	Con	Low	Medium	High	Hepatopancreas	Con	Low	Medium	High	Gill	Con	Low	Medium	High	Kidney	Con	Low	Medium	High	Stomach	Con	Low	Medium	High	Intestine	Con	Low	Medium	High
		0.175921	0.179571	0.0988788	0.116635		0.341213	0.3901	0.266344	0.228608		0.402905	0.397667	0.334607	0.395773		0.356935	0.0888047	0.0829658	0.0939491		0.569138	0.551902	0.583719	0.319002		0.514574	0.563471	0.51859	0.425149
		0.187248	0.169783	0.107617	0.100185		0.395544	0.383054	0.260232	0.208368		0.457961	0.380831	0.291993	0.376226		0.307547	0.0888074	0.0997375	0.0939509		0.517954	0.509779	0.560135	0.372536		0.561778	0.548922	0.550329	0.469074
		0.155679	0.193108	0.12392	0.101035		0.403077	0.36918	0.252862	0.243696		0.376672	0.390856	0.321371	0.405892		0.322431	0.114427	0.0940786	0.0844998		0.581054	0.565335	0.591779	0.32252		0.522954	0.559744	0.508119	0.402933
		0.189831	0.184424	0.118995	0.0968049		0.442579	0.361439	0.277642	0.267578		0.403304	0.358021	0.334898	0.396079		0.312272	0.107496	0.0941493	0.10523		0.54052	0.563492	0.585977	0.325701		0.533375	0.556043	0.57823	0.321395
		0.202518	0.202718	0.107759	0.100305		0.374652	0.34049	0.292445	0.251012		0.505131	0.420057	0.317948	0.406016		0.337993	0.102549	0.112581	0.105232		0.519507	0.511308	0.520315	0.373654		0.51264	0.504548	0.513437	0.368714
		0.167161	0.18104	0.124112	0.101158		0.434307	0.373733	0.285734	0.228789		0.41547	0.361844	0.350352	0.438738		0.354351	0.130705	0.106362	0.0948452		0.582797	0.567031	0.573555	0.323487		0.575092	0.559535	0.565972	0.319211
		0.184267	0.162602	0.101678	0.120713		0.434307	0.420593	0.285734	0.228789		0.458415	0.381208	0.292242	0.376512		0.293449	0.158119	0.0945218	0.105606		0.542142	0.565182	0.597765	0.326678		0.534975	0.557711	0.519862	0.322359
		0.17641	0.177688	0.111045	0.103078		0.3991	0.335868	0.262571	0.210242		0.398872	0.39087	0.331658	0.392682		0.339007	0.103007	0.113009	0.105608		0.540454	0.563423	0.565904	0.325661		0.533309	0.555975	0.558423	0.321356
		0.162568	0.189811	0.128522	0.103989		0.406701	0.392139	0.255135	0.245887		0.453377	0.377019	0.289471	0.373331		0.325414	0.0812475	0.106771	0.0951897		0.519444	0.511245	0.530779	0.373608		0.512577	0.504487	0.523762	0.368669
	Mean	0.177956	0.182305	0.113614	0.104878	Mean	0.403498	0.374066	0.270967	0.234774	Mean	0.430234	0.384264	0.318282	0.395694	Mean	0.327711	0.108351	0.100464	0.0982344	Mean	0.54589	0.545411	0.56777	0.340317	Mean	0.533475	0.545604	0.537414	0.368762
	SD	0.0146909	0.0120915	0.0106306	0.00813722	SD	0.0320748	0.0264555	0.0146952	0.0192082	SD	0.040698	0.018751	0.0222455	0.0203704	SD	0.0213575	0.023914	0.0100091	0.00752256	SD	0.0259505	0.0263362	0.0268736	0.0248156	SD	0.022006	0.0236208	0.0259124	0.0542092
				**	**				**	**			**	**	*			**	**	**					**					**
	p value		0.502711	1.14398e-08	6.01795e-10	p value		0.0496459	5.08368e-09	3.51614e-10	p value		0.00720873	1.97024e-06	0.0368893	p value		6.41646e-13	3.07983e-15	1.39031e-15	p value		0.969463	0.0980287	9.86246e-12	p value		0.276311	0.73267	2.72418e-07

## Sheet: ALP
	Statistical analysis of the effects of Cd on the activities of ALP enzymes in the visceral organs of Misgurnus anguillicaudatus（Figure 2 Analysis）
	Heart	Con	Low	Medium	High	Hepatopancreas	Con	Low	Medium	High	Gill	Con	Low	Medium	High	Kidney	Con	Low	Medium	High	Stomach	Con	Low	Medium	High	Intestine	Con	Low	Medium	High
		ND					0.13607	0.14438	0.142401	0.109961		0.122552	0.11995	0.117555	0.116325		ND					0.489031	0.4027	0.287553	0.155504		0.175721	0.158437	0.119251	0.142619
							0.13717	0.136447	0.137602	0.103037		0.126082	0.128683	0.113376	0.105647							0.393488	0.385985	0.283423	0.133675		0.137575	0.168985	0.154147	0.157974
							0.140287	0.145102	0.141824	0.120447		0.112818	0.126678	0.113105	0.118011							0.42531	0.414022	0.318839	0.136739		0.166983	0.148785	0.14707	0.170944
							0.140152	0.118231	0.160193	0.11326		0.121694	0.13911	0.116802	0.115581							0.435715	0.446224	0.317259	0.174164		0.146353	0.150515	0.113288	0.158245
							0.132455	0.132834	0.133954	0.0999464		0.131527	0.127782	0.112652	0.108949							0.440707	0.427503	0.312634	0.149716		0.152333	0.185884	0.169561	0.173771
							0.140258	0.14452	0.145752	0.109943		0.129905	0.122376	0.119731	0.118476							0.428435	0.458905	0.3523	0.153148		0.159904	0.142834	0.141188	0.164107
							0.134301	0.142711	0.140758	0.108532		0.123047	0.128713	0.1134	0.11967							0.424822	0.436068	0.310328	0.16981		0.135409	0.139979	0.105358	0.147167
							0.155127	0.134882	0.120021	0.101698		0.119587	0.126707	0.11813	0.118036							0.429689	0.417816	0.305818	0.145973		0.140969	0.172872	0.157692	0.161607
							0.148593	0.103423	0.140188	0.118882		0.137813	0.144158	0.130808	0.12563							0.417724	0.448432	0.344492	0.149319		0.148011	0.132836	0.131304	0.152619
						Mean	0.14049	0.133614	0.140299	0.109523	Mean	0.125003	0.129351	0.117284	0.116258						Mean	0.431658	0.426406	0.314738	0.152005	Mean	0.151473	0.155681	0.137651	0.158784
						SD	0.00718958	0.014177	0.0105546	0.00722194	SD	0.00733522	0.00765648	0.00569186	0.00588544						SD	0.0253535	0.0235892	0.0227554	0.0134141	SD	0.0136935	0.0173208	0.0218188	0.0102712
										**				*	**									**	**
						p value		0.212787	0.964717	9.78946e-08	p value		0.236427	0.0239596	0.0131211						p value		0.65526	1.82795e-08	2.55569e-15	p value		0.575483	0.12701	0.218366

## Sheet: ATPase
	Statistical analysis of the effects of Cd on the activities of ATPase enzymes in the visceral organs of Misgurnus anguillicaudatus（Figure 2 Analysis）
	Heart	Con	Low	Medium	High	Hepatopancreas	Con	Low	Medium	High	Gill	Con	Low	Medium	High	Kidney	Con	Low	Medium	High	Stomach	Con	Low	Medium	High	Intestine	Con	Low	Medium	High
		0.823661	0.827052	0.77866	0.492318		0.666281	0.654593	0.607056	0.463753		0.498021	0.384149	0.420305	0.315795		0.224145	0.21243	0.227812	0.137567		0.590011	0.71312	0.562555	0.349952		0.368753	0.241444	0.221454	0.249645
		0.824561	0.79933	0.712637	0.557836		0.689695	0.618386	0.58211	0.36309		0.524273	0.403446	0.462543	0.34515		0.199237	0.217501	0.240555	0.133939		0.597349	0.568135	0.607392	0.260682		0.376616	0.284596	0.286389	0.256353
		0.78857	0.76922	0.783685	0.58675		0.565503	0.586946	0.622011	0.35756		0.466064	0.386006	0.505739	0.30912		0.224145	0.222636	0.203573	0.143161		0.630755	0.641774	0.62328	0.311515		0.380387	0.280114	0.243737	0.212529
		0.840134	0.843593	0.794233	0.502165		0.63963	0.63081	0.582773	0.445203		0.522518	0.391343	0.462335	0.315303		0.24656	0.230673	0.247593	0.138324		0.679693	0.573817	0.584226	0.263289		0.339685	0.260541	0.262035	0.27123
		0.80807	0.783343	0.698384	0.546679		0.731077	0.651889	0.617036	0.384875		0.527902	0.407198	0.495232	0.334743		0.21916	0.236251	0.23761	0.144333		0.659302	0.688654	0.646543	0.387019		0.383391	0.240603	0.249325	0.214584
		0.74128	0.718598	0.64066	0.501495		0.605088	0.623832	0.665551	0.382589		0.555729	0.427653	0.474296	0.365859		0.24656	0.2199	0.22093	0.153477		0.652505	0.570882	0.627447	0.363677		0.349356	0.266083	0.273812	0.273327
		0.867435	0.846149	0.862061	0.645431		0.622057	0.639644	0.624216	0.393318		0.494028	0.409167	0.476737	0.327668		0.241629	0.22666	0.243241	0.145957		0.603322	0.621514	0.621081	0.403145		0.379582	0.287552	0.292403	0.258847
		0.850086	0.829226	0.84482	0.632522		0.723035	0.645379	0.610249	0.380642		0.488593	0.404666	0.443522	0.324063		0.225735	0.242438	0.223239	0.137763		0.652505	0.66869	0.613366	0.391051		0.362978	0.266395	0.210725	0.244792
		0.772799	0.753835	0.768011	0.575015		0.611072	0.629408	0.672134	0.386373		0.461403	0.382146	0.500681	0.306029		0.253957	0.225597	0.226658	0.146882		0.613151	0.688654	0.621081	0.387019		0.351641	0.243969	0.226818	0.252071
	Mean	0.812955	0.796705	0.764794	0.560024	Mean	0.650382	0.63121	0.620348	0.395267	Mean	0.504281	0.39953	0.471266	0.327081	Mean	0.231236	0.22601	0.230135	0.142378	Mean	0.630955	0.637249	0.611886	0.346372	Mean	0.365821	0.263477	0.251855	0.248153
	SD	0.0398483	0.0440188	0.0705611	0.055935	SD	0.0562447	0.0207	0.0314374	0.0357186	SD	0.030876	0.014887	0.0278157	0.0191385	SD	0.0173005	0.00937169	0.0136763	0.00605005	SD	0.0316111	0.0564612	0.0249079	0.0551098	SD	0.0158064	0.0184242	0.0290207	0.0217161
					**					**			**	*	**					**					**			**	**	**
	p value		0.423691	0.0935754	6.74254e-09	p value		0.35149	0.181095	3.86513e-09	p value		9.07123e-08	0.0298916	1.10608e-10	p value		0.437148	0.882737	1.21185e-10	p value		0.774174	0.17438	3.92703e-10	p value		9.56995e-10	1.70748e-08	5.44967e-10

## Sheet: NSE
	Statistical analysis of the effects of Cd on the activities of NSE enzymes in the visceral organs of Misgurnus anguillicaudatus（Figure 2 Analysis）
	Heart	Con	Low	Medium	High	Hepatopancreas	Con	Low	Medium	High	Gill	Con	Low	Medium	High	Kidney	Con	Low	Medium	High	Stomach	Con	Low	Medium	High	Intestine	Con	Low	Medium	High
		0.0888	0.104876	0.0937729	0.118926		0.22736	0.211245	0.197958	0.178972		0.12461	0.117374	0.127126	0.153209		0.12125	0.125258	0.114674	0.111343		0.165651	0.160342	0.13035	0.133891		0.126549	0.13152	0.131999	0.126111
		0.0894104	0.0973123	0.119067	0.109432		0.222759	0.202026	0.196267	0.15229		0.130746	0.130585	0.126354	0.130059		0.120028	0.115272	0.121706	0.145373		0.173556	0.168276	0.132206	0.13008		0.113821	0.123684	0.122907	0.114536
		0.0910398	0.0968972	0.0942748	0.0983776		0.216599	0.225045	0.211518	0.173033		0.132448	0.124641	0.142991	0.135511		0.119294	0.122395	0.133806	0.115575		0.182535	0.179159	0.152027	0.1361		0.124409	0.1237	0.135024	0.124405
		0.103008	0.110056	0.108777	0.103538		0.247823	0.229807	0.215594	0.195079		0.129268	0.1242	0.12549	0.149593		0.120191	0.120975	0.116729	0.114097		0.175053	0.161761	0.138976	0.13409		0.127701	0.132717	0.133223	0.140258
		0.109161	0.101282	0.105175	0.109408		0.242808	0.219758	0.213751	0.165996		0.136822	0.128877	0.139585	0.135284		0.133375	0.137783	0.125941	0.122478		0.187183	0.179269	0.14087	0.138489		0.127815	0.122835	0.133344	0.157397
		0.105606	0.10124	0.109359	0.114118		0.234181	0.237937	0.217803	0.178224		0.143559	0.143383	0.138736	0.142805		0.138101	0.121171	0.112688	0.114419		0.176192	0.189304	0.122611	0.125763		0.122753	0.114032	0.134568	0.128567
		0.0992334	0.105618	0.10276	0.107232		0.229442	0.211046	0.222002	0.200932		0.122118	0.115027	0.124584	0.150745		0.118989	0.119765	0.115581	0.132956		0.175827	0.174414	0.13365	0.131481		0.130106	0.126046	0.125303	0.116771
		0.112279	0.0996126	0.118566	0.112857		0.223097	0.216551	0.253836	0.184341		0.128131	0.127974	0.133826	0.127458		0.122342	0.126385	0.115688	0.102345		0.187584	0.172844	0.147577	0.14216		0.120676	0.126062	0.13765	0.126829
		0.118985	0.119398	0.114641	0.119254		0.245258	0.217432	0.202095	0.156859		0.125607	0.118313	0.128143	0.124195		0.141108	0.116309	0.122783	0.136412		0.202445	0.163812	0.150575	0.147908		0.133165	0.118432	0.121403	0.139519
	Mean	0.101947	0.104032	0.107377	0.110349	Mean	0.232147	0.218983	0.214536	0.176192	Mean	0.130368	0.125597	0.131871	0.138762	Mean	0.126075	0.122812	0.119955	0.121666	Mean	0.18067	0.172131	0.13876	0.135551	Mean	0.125222	0.124336	0.130602	0.130488
	SD	0.0107234	0.0071289	0.00937692	0.006842	SD	0.0110534	0.0107963	0.0172669	0.0162252	SD	0.00661652	0.00860876	0.00702482	0.0107492	SD	0.0088637	0.00668538	0.00677494	0.0138489	SD	0.0107183	0.00956278	0.00999023	0.00663788	SD	0.00568968	0.00582946	0.00584407	0.0133088
								*	*	**														**	**
	p value		0.633639	0.269636	0.0649776	p value		0.0211435	0.0202617	2.3145e-07	p value		0.206015	0.646647	0.0633485	p value		0.390989	0.119305	0.432939	p value		0.0935237	2.20804e-07	1.01338e-08	p value		0.748693	0.0652695	0.291184

## Sheet: POX
	Statistical analysis of the effects of Cd on the activities of POX enzymes in the visceral organs of Misgurnus anguillicaudatus（Figure 2 Analysis）
	Heart	Con	Low	Medium	High	Hepatopancreas	Con	Low	Medium	High	Gill	Con	Low	Medium	High	Kidney	Con	Low	Medium	High	Stomach	Con	Low	Medium	High	Intestine	Con	Low	Medium	High
		0.187306	0.189852	0.149685	0.1433		0.136559	0.128279	0.140184	0.132895		0.19318	0.150964	0.153885	0.157562		0.614393	0.457619	0.344342	0.249716		0.141791	0.144511	0.146451	0.152971		0.137467	0.154176	0.170084	0.141681
		0.200935	0.169157	0.176337	0.158384		0.136559	0.156973	0.135455	0.124115		0.225978	0.198568	0.153399	0.167073		0.588409	0.493501	0.417956	0.263883		0.144871	0.128941	0.158663	0.169097		0.155361	0.134789	0.148815	0.169279
		0.18142	0.153245	0.147588	0.143003		0.15538	0.131729	0.15638	0.142946		0.194819	0.183302	0.140788	0.153015		0.553064	0.411583	0.374282	0.27537		0.138757	0.153752	0.138354	0.135802		0.161047	0.15387	0.167366	0.152269
		0.191052	0.153185	0.152879	0.146366		0.13929	0.130845	0.142988	0.135553		0.197044	0.203967	0.156962	0.160713		0.628681	0.466771	0.351229	0.25471		0.144627	0.147401	0.14938	0.15611		0.140216	0.15726	0.173486	0.144515
		0.204953	0.15234	0.159664	0.141352		0.13929	0.120941	0.138164	0.126597		0.210497	0.202523	0.156467	0.170414		0.602177	0.503371	0.426315	0.269161		0.157769	0.15212	0.161836	0.172559		0.158468	0.137485	0.151791	0.172665
		0.185048	0.15651	0.15074	0.146063		0.158488	0.134364	0.128907	0.145805		0.198716	0.186952	0.163604	0.156076		0.566125	0.419814	0.381767	0.280877		0.141532	0.156827	0.141122	0.138598		0.164268	0.156948	0.150713	0.155314
		0.198724	0.147406	0.154507	0.167523		0.135057	0.147265	0.153965	0.17575		0.203492	0.196392	0.151712	0.165235		0.580837	0.488072	0.413359	0.26098		0.143278	0.171926	0.156917	0.147193		0.153652	0.133306	0.147178	0.167417
		0.179424	0.15145	0.175445	0.141319		0.153671	0.13028	0.149895	0.141374		0.192676	0.181295	0.139239	0.191332		0.54588	0.407055	0.370165	0.272341		0.127231	0.152061	0.136833	0.134264		0.159275	0.152178	0.165525	0.150594
		0.18895	0.15139	0.151087	0.164646		0.137758	0.129406	0.141415	0.134062		0.194877	0.192282	0.155236	0.158946		0.620665	0.461637	0.347366	0.251908		0.143036	0.145779	0.147737	0.154349		0.138673	0.15553	0.171578	0.142925
	Mean	0.190868	0.158282	0.157548	0.150217	Mean	0.143561	0.134454	0.143039	0.1399	Mean	0.201253	0.188472	0.152366	0.164485	Mean	0.588914	0.456603	0.380753	0.264327	Mean	0.142544	0.150368	0.148588	0.151216	Mean	0.152047	0.148394	0.160726	0.155184
	SD	0.00888786	0.0133098	0.0109429	0.010393	SD	0.00938898	0.0109277	0.00891718	0.0152467	SD	0.0108784	0.0162177	0.00776715	0.0115016	SD	0.0298676	0.0362353	0.0316034	0.0109263	SD	0.00784811	0.0114407	0.00902059	0.0137499	SD	0.0104211	0.0100757	0.0108442	0.0118845
			**	**	**									**	**			**	**	**
	p value		1.51082e-05	2.5572e-06	1.31844e-07	p value		0.076098	0.905182	0.548151	p value		0.0672058	7.44227e-09	3.17158e-06	p value		2.69461e-07	1.46478e-10	1.24415e-15	p value		0.110026	0.148877	0.119834	p value		0.460521	0.10266	0.559898

## Sheet: SDH
		Statistical analysis of the effects of Cd on the activities of SDH enzymes in the visceral organs of Misgurnus anguillicaudatus（Figure 2 Analysis）
		Heart	Con	Low	Medium	High	Hepatopancreas	Con	Low	Medium	High	Gill	Con	Low	Medium	High	Kidney	Con	Low	Medium	High	Stomach	Con	Low	Medium	High	Intestine	Con	Low	Medium	High
			0.350721	0.319519	0.29302	0.165838		0.18309	0.164466	0.097133	0.088209		ND					ND					0.14202	0.162098	0.174816	0.098578		0.0935216	0.105682	0.148281	0.122412
			0.388863	0.341152	0.294262	0.209976		0.205142	0.184903	0.100585	0.0823816												0.149334	0.151253	0.172544	0.0988093		0.122059	0.121326	0.118955	0.117492
			0.371427	0.354833	0.340085	0.210382		0.185028	0.161903	0.0938359	0.093901												0.1475	0.160222	0.160324	0.0978963		0.120246	0.115713	0.117171	0.103571
			0.358566	0.339741	0.307789	0.199203		0.199557	0.195166	0.109195	0.101833												0.147541	0.129508	0.13759	0.071533		0.123218	0.114984	0.114476	0.146923
			0.346614	0.335757	0.295837	0.211155		0.192905	0.172949	0.104885	0.107943												0.142623	0.127869	0.132672	0.077643		0.129532	0.115312	0.103027	0.123077
			0.378486	0.303884	0.319741	0.207171		0.210643	0.155211	0.113506	0.105906												0.155738	0.114754	0.142508	0.0756063		0.127088	0.124839	0.101435	0.121538
			0.314741	0.342928	0.291853	0.191235		0.175166	0.19694	0.103448	0.0977597												0.129508	0.13082	0.131033	0.0674597		0.117312	0.119911	0.115635	0.110769
			0.346614	0.323805	0.283884	0.195219		0.192905	0.206297	0.100575	0.0997963												0.142623	0.122951	0.127754	0.0694963		0.119756	0.129767	0.10868	0.107692
			0.390438	0.329781	0.284681	0.199602		0.217295	0.199623	0.100862	0.102037												0.160656	0.12541	0.128082	0.0717367		0.122444	0.118269	0.130853	0.113226
		Mean	0.360719	0.332378	0.301239	0.198865	Mean	0.195748	0.18194	0.102669	0.0977518											Mean	0.146394	0.136098	0.145258	0.0809732	Mean	0.119464	0.118423	0.117613	0.118522
		SD	0.0242954	0.0150649	0.0183816	0.0143138	SD	0.0137103	0.0187642	0.00598136	0.00830429											SD	0.00890638	0.0172094	0.0189529	0.0134309	SD	0.0104134	0.00681634	0.0145168	0.0126572
				**	**	**				**	**															**
		p value		0.00894841	2.42997e-05	9.48984e-12	p value		0.0936526	2.76261e-12	3.62133e-12											p value		0.130516	0.87282	1.661e-09	p value		0.805023	0.759936	0.865341
													0.105838	0.149976	0.150382
													0.028209	0.0223816	0.033901
													0.067602	0.067831	0.066927
													0.062412	0.0574924	0.0435708
