# Supplementary material for: The effects of the heavy metals cadmium and lead on six metabolic and immune-related enzymes in the loach (Misgurnus anguillicaudatus)
Source: PeerJ. 2026 Jan 7;14:e20547. doi: 10.7717/peerj.20547 (PMC12790279; doi:10.7717/peerj.20547)
Supplement: Supplemental Information 5 — ACP, acid phosphatase; ALP, alkaline phosphatase; ATPase, adenosine triphosphatase; MOD, mean optical density; NSE, non-specific esterase; POX, peroxidase; SD, standard deviation; SDH, succinate dehydrogenase. Data expressed as mean ± SD, n = 9; * significant difference (p < 0.05); ** extremely significant difference (p < 0.01). [file peerj-14-20547-s005.xlsx]

## Sheet: ACP
Statistical analysis of the effects of Pb on the activities of ACP enzymes in the visceral organs of Misgurnus anguillicaudatus（Figure 4 Analysis）
	Heart	Con	Low	Medium	High	Hepatopancreas	Con	Low	Medium	High	Gill	Con	Low	Medium	High	Kidney	Con	Low	Medium	High	Stomach	Con	Low	Medium	High	Intestine	Con	Low	Medium	High
		0.121178	0.103394	0.0752768	0.111058		0.374709	0.128384	0.207343	0.0721828		0.480162	0.450162	0.218045	0.370904		0.254734	0.347449	0.278537	0.221744		0.615376	0.507959	0.534312	0.615982		0.505232	0.53906	0.465413	0.297987
		0.176778	0.081104	0.0857596	0.0919041		0.358377	0.131123	0.154352	0.0767097		0.366963	0.336963	0.249884	0.30121		0.240863	0.345473	0.263707	0.24779		0.603936	0.624804	0.600943	0.582161		0.575257	0.571721	0.43172	0.265286
		0.104383	0.114034	0.0929389	0.148781		0.426672	0.156637	0.144603	0.0845035		0.391314	0.361314	0.277242	0.400098		0.215815	0.324719	0.281988	0.244382		0.610401	0.59452	0.515134	0.643412		0.563854	0.523786	0.534269	0.225985
		0.125933	0.0760089	0.0986166	0.111208		0.330725	0.164871	0.11426	0.159067		0.391145	0.361145	0.211892	0.307034		0.350279	0.300311	0.336353	0.29473		0.507902	0.567376	0.586327	0.548595		0.562489	0.459798	0.53038	0.193665
		0.128481	0.106286	0.169673	0.156634		0.307472	0.186592	0.111083	0.136748		0.394685	0.364685	0.206904	0.30834		0.336755	0.298073	0.311414	0.360804		0.567753	0.513653	0.642716	0.526253		0.529337	0.467345	0.470435	0.190083
		0.157465	0.181897	0.139418	0.0865295		0.300149	0.186142	0.102791	0.147433		0.503703	0.473703	0.279477	0.284648		0.321245	0.34105	0.374291	0.292743		0.507428	0.499104	0.607015	0.523615		0.564028	0.552038	0.51152	0.226002
		0.201855	0.11443	0.134638	0.0601041		0.362213	0.142064	0.126959	0.113792		0.365097	0.335097	0.265644	0.314725		0.30271	0.267201	0.244309	0.240156		0.511678	0.592011	0.625769	0.600723		0.456862	0.447	0.521543	0.26002
		0.119616	0.183371	0.07713	0.103408		0.392122	0.162939	0.116992	0.105628		0.392093	0.362093	0.320692	0.336876		0.287473	0.275463	0.244964	0.247692		0.504326	0.559765	0.567404	0.634768		0.455056	0.472086	0.407858	0.248995
		0.136256	0.121481	0.067498	0.0565695		0.384627	0.162882	0.14588	0.0989367		0.425317	0.395317	0.30968	0.312468		0.284104	0.280098	0.265521	0.245785		0.523696	0.581543	0.652942	0.623427		0.493959	0.465384	0.446766	0.318173
	Mean	0.141327	0.120223	0.10455	0.102911	Mean	0.359674	0.157959	0.136029	0.110555	Mean	0.412275	0.382275	0.25994	0.326256	Mean	0.28822	0.308871	0.289009	0.266203	Mean	0.550277	0.560082	0.592507	0.588771	Mean	0.522897	0.499802	0.479989	0.247355
	SD	0.0313265	0.0384503	0.0351191	0.0344513	SD	0.0410864	0.0210955	0.0320888	0.0313564	SD	0.0487587	0.0487587	0.0416177	0.0369645	SD	0.0449048	0.031593	0.0437398	0.0428623	SD	0.0487044	0.0440158	0.0469081	0.0460941	SD	0.0472128	0.046653	0.0462963	0.043501
				*	*			**	**	**				**	**															**
	p value		0.219969	0.0322869	0.0248907	p value		5.70107e-10	7.41695e-10	1.32256e-10	p value		0.210286	2.39197e-06	0.000654032	p value		0.275802	0.970336	0.303121	p value		0.660127	0.0793781	0.104324	p value		0.312071	0.069348	7.36345e-10

## Sheet: ALP
Statistical analysis of the effects of Pb on the activities of ALP enzymes in the visceral organs of Misgurnus anguillicaudatus（Figure 4 Analysis）
	Heart	Con	Low	Medium	High	Hepatopancreas	Con	Low	Medium	High	Gill	Con	Low	Medium	High	Kidney	Con	Low	Medium	High	Stomach	Con	Low	Medium	High	Intestine	Con	Low	Medium	High
		ND					0.163737	0.150085	0.14004	0.11662		0.120828	0.178982	0.143856	0.124451		ND					0.412243	0.460073	0.467729	0.263231		0.158438	0.165312	0.150312	0.158409
							0.174935	0.170034	0.121781	0.138772		0.126619	0.174586	0.134606	0.122128							0.455729	0.399844	0.397335	0.278225		0.159386	0.177844	0.162844	0.137483
							0.153022	0.144192	0.139012	0.137697		0.129713	0.181191	0.137905	0.128137							0.406525	0.356547	0.378787	0.262486		0.183327	0.184669	0.169669	0.156758
							0.143959	0.147124	0.145884	0.151669		0.16193	0.130117	0.138998	0.123318							0.407858	0.349502	0.358192	0.202592		0.176318	0.165373	0.150373	0.148648
							0.146294	0.146342	0.145262	0.167378		0.151661	0.128726	0.1399	0.134456							0.447287	0.376706	0.378746	0.164792		0.177238	0.194002	0.179002	0.155054
							0.137983	0.148406	0.146521	0.151152		0.144849	0.127489	0.152077	0.099762							0.423493	0.333886	0.364769	0.162484		0.175188	0.170202	0.155202	0.15698
							0.184475	0.145857	0.173588	0.153304		0.137163	0.112858	0.138576	0.124063							0.342781	0.359425	0.368957	0.234794		0.156157	0.176571	0.161571	0.177336
							0.184074	0.145679	0.151612	0.151484		0.141357	0.128359	0.129015	0.140415							0.344833	0.369189	0.441138	0.272364		0.153178	0.199969	0.184969	0.158201
							0.187923	0.123637	0.148616	0.147459		0.138826	0.126527	0.119017	0.124549							0.347751	0.365138	0.331246	0.26378		0.153167	0.159847	0.144847	0.165347
						Mean	0.164045	0.146817	0.145813	0.14617	Mean	0.139216	0.143204	0.137106	0.124587						Mean	0.398722	0.374479	0.387433	0.233861	Mean	0.165822	0.177088	0.162088	0.157135
						SD	0.0194508	0.0117203	0.0135595	0.014077	SD	0.0127406	0.0268216	0.00923856	0.0110948						SD	0.0435612	0.0369284	0.0424956	0.0459234	SD	0.0119583	0.0136405	0.0136405	0.0108455
								*	*	*					*										**
						p value		0.0369583	0.0347788	0.04016	p value		0.692376	0.692776	0.0194247						p value		0.221016	0.585566	7.51851e-07	p value		0.0809006	0.545575	0.126017

## Sheet: ATPase
Statistical analysis of the effects of Pb on the activities of ATPase enzymes in the visceral organs of Misgurnus anguillicaudatus（Figure 4 Analysis）
	Heart	Con	Low	Medium	High	Hepatopancreas	Con	Low	Medium	High	Gill	Con	Low	Medium	High	Kidney	Con	Low	Medium	3	Stomach	Con	Low	Medium	High	Intestine	Con	Low	Medium	High
		0.891157	0.895823	0.393973	0.540063		0.688024	0.480362	0.432124	0.378293		0.51973	0.471769	0.391128	0.245137		0.229567	0.257069	0.218629	0.239598		0.631733	0.606621	0.586899	0.582942		0.310903	0.331512	0.205066	0.189674
		0.918131	0.860313	0.354428	0.584899		0.702345	0.506801	0.422985	0.458871		0.504828	0.51535	0.405276	0.321678		0.224511	0.233719	0.210838	0.248841		0.674796	0.597876	0.651168	0.587768		0.339479	0.348417	0.206827	0.166898
		0.912029	0.894269	0.388772	0.540206		0.730924	0.516611	0.433255	0.419611		0.540824	0.541573	0.434519	0.318435		0.225553	0.230441	0.199762	0.23894		0.600452	0.562375	0.698715	0.654704		0.31345	0.407613	0.224842	0.20293
		0.928803	0.834777	0.359835	0.447231		0.636334	0.461916	0.508156	0.339604		0.535322	0.485022	0.520402	0.228217		0.370666	0.302837	0.230677	0.256018		0.709887	0.647522	0.681063	0.539889		0.362246	0.287913	0.250623	0.157439
		0.833344	0.818271	0.417442	0.499416		0.701092	0.489604	0.553139	0.366612		0.519973	0.52991	0.397696	0.212821		0.315073	0.283109	0.243513	0.251669		0.612434	0.717476	0.567372	0.61638		0.379765	0.303227	0.308505	0.171643
		0.912421	0.835983	0.446928	0.560323		0.696908	0.47776	0.497121	0.393657		0.557048	0.551771	0.460086	0.295211		0.305652	0.276922	0.248644	0.297903		0.628319	0.657922	0.594413	0.608698		0.393264	0.380003	0.215743	0.201443
		0.986039	0.905799	0.439655	0.55881		0.746094	0.448368	0.445406	0.450308		0.509811	0.52014	0.49019	0.27029		0.258494	0.251732	0.276957	0.232029		0.663119	0.580417	0.58592	0.570103		0.360818	0.303139	0.181212	0.224981
		0.873148	0.969933	0.540206	0.446635		0.706404	0.46602	0.500926	0.489745		0.546162	0.536573	0.468438	0.209347		0.269018	0.256558	0.275123	0.247042		0.615518	0.613049	0.647531	0.608003		0.376567	0.308793	0.224625	0.313411
		0.941336	0.924306	0.468262	0.527383		0.647288	0.356977	0.475579	0.423635		0.540605	0.489513	0.402775	0.266014		0.284248	0.268558	0.257574	0.306026		0.626898	0.555152	0.655166	0.672214		0.415314	0.277298	0.191893	0.250317
	Mean	0.910712	0.882164	0.423278	0.522774	Mean	0.695046	0.467157	0.474299	0.413371	Mean	0.530478	0.515736	0.441168	0.263017	Mean	0.275865	0.262327	0.240191	0.257563	Mean	0.640351	0.615379	0.629805	0.604522	Mean	0.361312	0.327546	0.22326	0.208749
	SD	0.0429799	0.0491289	0.0584937	0.049043	SD	0.0351651	0.0465422	0.0440521	0.0482947	SD	0.0176634	0.0278046	0.0460746	0.0426343	SD	0.0489166	0.0232732	0.0274048	0.0262713	SD	0.0352279	0.0516169	0.0470465	0.0408947	SD	0.0350357	0.0436581	0.0377977	0.0489358
				**	**			**	**	**				**	**														**	**
	p value		0.20802	8.55573e-13	5.49814e-12	p value		2.8944e-09	2.7935e-09	1.83647e-10	p value		0.198136	5.56039e-05	8.18865e-12	p value		0.464316	0.0744039	0.337465	p value		0.248063	0.597802	0.0637971	p value		0.0891812	5.23174e-07	1.06335e-06
										0.540605		0.489513			#DIV/0!

## Sheet: NSE
Statistical analysis of the effects of Pb on the activities of NSE enzymes in the visceral organs of Misgurnus anguillicaudatus（Figure 4 Analysis）
	Heart	Con	Low	Medium	High	Hepatopancreas	Con	Low	Medium	High	Gill	Con	Low	Medium	High	Kidney	Con	Low	Medium	High	Stomach	Con	Low	Medium	High	Intestine	Con	Low	Medium	High
		0.100332	0.103398	0.10245	0.0968574		0.208754	0.116312	0.139457	0.129451		0.179566	0.12716	0.124391	0.118345		0.127614	0.127713	0.131625	0.124808		0.195059	0.190937	0.169227	0.169065		0.0941777	0.15415	0.134356	0.104322
		0.101924	0.121829	0.088888	0.101459		0.223172	0.133835	0.13747	0.131412		0.170444	0.132891	0.137206	0.116096		0.134756	0.129854	0.156097	0.122662		0.183762	0.216324	0.169305	0.173767		0.0957458	0.15618	0.150272	0.105085
		0.103655	0.100645	0.0891209	0.099178		0.203087	0.138446	0.136585	0.142733		0.14239	0.133013	0.131006	0.131922		0.13065	0.10632	0.136509	0.129754		0.185901	0.183481	0.177072	0.137946		0.0983755	0.148108	0.120603	0.110946
		0.0950001	0.0876403	0.0967454	0.123619		0.232332	0.131758	0.138985	0.143563		0.129126	0.155937	0.135587	0.120795		0.103543	0.125487	0.130796	0.141359		0.238858	0.19509	0.238333	0.202679		0.109652	0.17447	0.118212	0.0999918
		0.102493	0.0923002	0.0991482	0.10172		0.236086	0.140197	0.143514	0.153508		0.12181	0.155345	0.133787	0.128388		0.130574	0.125317	0.129457	0.138937		0.229302	0.184838	0.235448	0.212105		0.116191	0.169955	0.12286	0.100466
		0.0873124	0.0903709	0.0954392	0.0981957		0.230169	0.128594	0.13813	0.150937		0.133869	0.15984	0.139059	0.0954326		0.130641	0.129793	0.10827	0.107784		0.237988	0.173124	0.212675	0.206087		0.119604	0.157112	0.130579	0.107774
		0.0813288	0.09904	0.101344	0.0857435		0.18755	0.143994	0.112053	0.122398		0.140904	0.135103	0.165415	0.120418		0.158761	0.149045	0.127999	0.131476		0.202389	0.197427	0.179552	0.1763		0.107752	0.137263	0.171691	0.134894
		0.122405	0.0883913	0.123661	0.0769084		0.174735	0.161482	0.115605	0.122159		0.149237	0.137258	0.142166	0.126285		0.127966	0.12828	0.131673	0.117856		0.202365	0.191169	0.193645	0.181129		0.115421	0.126173	0.154525	0.130082
		0.0998089	0.0871596	0.0979921	0.0790133		0.19502	0.155384	0.111965	0.117295		0.146654	0.140659	0.153353	0.139937		0.126591	0.127525	0.128587	0.123536		0.192764	0.191521	0.170447	0.147504		0.11932	0.137566	0.134583	0.110551
	Mean	0.0993622	0.0967526	0.099421	0.0958549	Mean	0.210101	0.138889	0.130418	0.134828	Mean	0.146	0.141912	0.140219	0.121958	Mean	0.130122	0.127704	0.131224	0.126464	Mean	0.207599	0.191546	0.193967	0.178509	Mean	0.108471	0.15122	0.13752	0.111568
	SD	0.011491	0.011174	0.0102629	0.0141378	SD	0.0217392	0.013705	0.0130912	0.0132768	SD	0.0186788	0.0119705	0.0123481	0.0124366	SD	0.0140189	0.0107975	0.0122192	0.0103814	SD	0.0219161	0.0117846	0.0280754	0.0255038	SD	0.0101219	0.0157232	0.017889	0.0125225
								**	**	**					**										*			**	**
	p value		0.631869	0.991007	0.57162	p value		3.35827e-07	6.26675e-08	1.42829e-07	p value		0.588047	0.449903	0.00541397	p value		0.687279	0.861172	0.538142	p value		0.0708243	0.267767	0.0195301	p value		3.84681e-06	0.00062425	0.571966

## Sheet: POX
Statistical analysis of the effects of Pb on the activities of POX enzymes in the visceral organs of Misgurnus anguillicaudatus（Figure 4 Analysis）
	Heart	Con	Low	Medium	High	Hepatopancreas	Con	Low	Medium	High	Gill	Con	Low	Medium	High	Kidney	Con	Low	Medium	High	Stomach	Con	Low	Medium	High	Intestine	Con	Low	Medium	High
		0.204915	0.146194	0.157231	0.167085		0.202062	0.180503	0.17812	0.194505		0.273858	0.0902372	0.135161	0.141887		0.628917	0.641707	0.387942	0.4612		0.131156	0.17759	0.132354	0.140679		0.132723	0.104133	0.0912999	0.1213
		0.21779	0.145589	0.152467	0.17315		0.201087	0.195527	0.181937	0.19824		0.224003	0.0998739	0.13222	0.116257		0.614811	0.58255	0.406254	0.425402		0.133141	0.142065	0.113415	0.14817		0.123266	0.104825	0.0894973	0.119497
		0.211228	0.148658	0.160136	0.168771		0.207761	0.174901	0.17798	0.198059		0.241541	0.0916869	0.132876	0.117587		0.543682	0.563554	0.334281	0.431917		0.122735	0.150232	0.132541	0.133359		0.12207	0.10063	0.0879917	0.117992
		0.228379	0.170711	0.173817	0.173965		0.196947	0.178111	0.185396	0.184987		0.223903	0.107475	0.0837515	0.115204		0.592398	0.584087	0.291549	0.509803		0.169529	0.166836	0.159672	0.14226		0.103406	0.10899	0.0959106	0.125911
		0.241461	0.177883	0.171781	0.177211		0.193856	0.186365	0.18748	0.184962		0.25291	0.125395	0.0808027	0.0883167		0.626566	0.607351	0.340297	0.56906		0.152015	0.165973	0.151395	0.168947		0.103855	0.100234	0.0930975	0.123097
		0.211092	0.179448	0.181099	0.170456		0.190646	0.186291	0.1876	0.188934		0.273325	0.164557	0.0813796	0.11774		0.66662	0.528186	0.350323	0.526223		0.151542	0.153588	0.151548	0.12869		0.102711	0.102487	0.0984569	0.128457
		0.202773	0.171085	0.181061	0.156479		0.174466	0.169638	0.197716	0.179925		0.203173	0.134229	0.102244	0.12218		0.649676	0.548265	0.375445	0.454022		0.131188	0.126047	0.105865	0.144861		0.113266	0.146315	0.115109	0.145109
		0.210698	0.170096	0.171438	0.169805		0.168419	0.179287	0.190232	0.17466		0.205824	0.125904	0.0940258	0.117458		0.603901	0.514145	0.4451	0.43234		0.142231	0.126428	0.104356	0.140174		0.103385	0.127747	0.11753	0.14753
		0.186942	0.170573	0.179225	0.151295		0.179894	0.180005	0.1939	0.176322		0.253943	0.152661	0.093775	0.109659		0.654812	0.540694	0.392294	0.488796		0.151553	0.127123	0.102872	0.145427		0.110436	0.131213	0.122064	0.152064
	Mean	0.212809	0.164471	0.169806	0.16758	Mean	0.190571	0.181181	0.186707	0.186733	Mean	0.239164	0.121335	0.104026	0.116254	Mean	0.620154	0.567838	0.369276	0.47764	Mean	0.142788	0.148431	0.128224	0.143619	Mean	0.112791	0.114064	0.101217	0.131217
	SD	0.0155332	0.0136766	0.0107113	0.00842522	SD	0.01348	0.00746933	0.00671894	0.00889253	SD	0.0265832	0.0263435	0.023098	0.0137962	SD	0.0375179	0.0404533	0.0454122	0.0494678	SD	0.0146588	0.0193852	0.0224643	0.0112779	SD	0.0109366	0.0167219	0.0132571	0.0132571
			**	**	**								**	**	**			**	**	**										**
	p value		2.96006e-06	3.99198e-06	9.40226e-07	p value		0.0862771	0.452729	0.486102	p value		6.04175e-08	3.74487e-09	1.41802e-09	p value		0.01171	8.24789e-10	3.66022e-06	p value		0.496022	0.122889	0.894479	p value		0.85087	0.0604204	0.00538735

## Sheet: SDH
Statistical analysis of the effects of Pb on the activities of SDH enzymes in the visceral organs of Misgurnus anguillicaudatus（Figure 4 Analysis）
	Heart	Con	Low	Medium	High	Hepatopancreas	Con	Low	Medium	High	Gill	Con	Low	Medium	High	Kidney	Con	Low	Medium	High	Stomach	Con	Low	Medium	High	Intestine	Con	Low	Medium	High
		0.333708	0.352519	0.304758	0.31218		0.184099	0.0883582	0.088256	0.0591387		ND					ND					0.137502	0.116437	0.0609686	0.0656672		0.112825	0.0953399	0.0922431	0.0705791
		0.364102	0.402875	0.323682	0.308223		0.18519	0.0818911	0.0812948	0.0575504												0.12172	0.136391	0.0627627	0.0837932		0.0619863	0.0948057	0.0766657	0.0500447
		0.339958	0.354461	0.32089	0.318799		0.165153	0.0798856	0.075626	0.0563566												0.118016	0.0711059	0.0602615	0.0609414		0.073044	0.0646552	0.148231	0.107588
		0.37111	0.308054	0.314681	0.310159		0.129104	0.0769788	0.087897	0.0727948												0.11246	0.0506265	0.0982328	0.0472026		0.0998385	0.101294	0.090223	0.109766
		0.411855	0.301842	0.329777	0.336938		0.132927	0.0834596	0.0947285	0.0711342												0.10023	0.0570664	0.0860194	0.0435847		0.0979878	0.166242	0.0919016	0.114035
		0.386141	0.33812	0.304944	0.282669		0.158585	0.0966744	0.0961661	0.0626341												0.0869856	0.0426248	0.0909377	0.0530145		0.132358	0.0717549	0.157996	0.0905245
		0.381715	0.327369	0.34645	0.250167		0.134527	0.0642334	0.0666149	0.0859115												0.106281	0.0649995	0.0648125	0.0893964		0.0714105	0.158803	0.151251	0.127359
		0.404971	0.303776	0.329508	0.30139		0.160563	0.0613083	0.0657791	0.0834626												0.104198	0.0612439	0.0749402	0.0894024		0.10004	0.124398	0.0782796	0.0634114
		0.389051	0.326135	0.340527	0.257619		0.113351	0.0759093	0.0752207	0.0758656												0.0910126	0.0591899	0.0681009	0.112108		0.148268	0.0794573	0.0894085	0.079189
	Mean	0.375846	0.335017	0.323913	0.297572	Mean	0.1515	0.0787443	0.081287	0.0694276											Mean	0.108712	0.0732983	0.0741151	0.0716789	Mean	0.0997508	0.106306	0.108467	0.0902774
	SD	0.0266541	0.032093	0.0144515	0.028648	SD	0.0252648	0.0110289	0.0112857	0.0111149											SD	0.015741	0.0315793	0.0142452	0.0231773	SD	0.0285785	0.0364051	0.0335802	0.0261496
			**	**	**			**	**	**													**	**	**
	p value		0.00968745	9.90829e-05	1.84838e-05	p value		6.34058e-07	1.05002e-06	1.31351e-07											p value		0.00828869	0.000163868	0.00111007	p value		0.676585	0.561483	0.47376
